# Supplementary material for: Hierarchical genetic structure in an evolving species complex: Insights from genome wide ddRAD data in Sebastes mentella
Source: PLoS One. 2021 May 27;16(5):e0251976. doi: 10.1371/journal.pone.0251976 (PMC8158871; doi:10.1371/journal.pone.0251976)
Supplement: S4 File — (XLSX) [file pone.0251976.s004.xlsx]

## Sheet: Outliers
	90 outliers	(before DAPC)						109 outliers (after DAPC)					97 Selected 0utliers	(after DAPC)					before DAPC	after DAPC
	Loci names	Catalog	SNP position	81 catalogs	81 Selected SNPs			Loci names	Catalog	SNP position			Loci names	Catalog	SNP position	97 catalogs			81 Selected SNPs	97 Selected 0utliers
	3_136	3	136	3	3_136			3_136	3	136			36_30	36	30	36			3_136	36_30
	36_30	36	30	36	36_30			36_30	36	30			436_60	436	60	436			36_30	436_60
	37_156	37	156	37	37_156			155_101	155	101			478_182	478	182	478			155_101	499_162
	155_101	155	101	155	155_101			276_104	276	104			499_162	499	162	499			278_73	789_40
	278_73	278	73	278	278_73			278_73	278	73			789_40	789	40	789			436_60	982_80
	397_13	397	13	397	397_13			292_168	292	168			937_32	937	32	937			499_162	1355_149
	397_26	397	26	436	436_60			397_13	397	13			982_80	982	80	982			626_78	1379_32
	397_27	397	27	499	499_162			397_26	397	26			1355_149	1355	149	1355			789_40	1448_11
	397_101	397	101	626	626_78			397_27	397	27			1379_32	1379	32	1379			926_26	1575_46
	436_60	436	60	789	789_40			397_101	397	101			1448_11	1448	11	1448			937_32	1604_143
	499_162	499	162	926	926_26			436_60	436	60			1575_46	1575	46	1575			1355_149	1841_184
	626_78	626	78	937	937_32			478_182	478	182			1604_143	1604	143	1604			1379_32	1913_221
	789_40	789	40	1063	1063_193			499_162	499	162			1724_64	1724	64	1724			1448_11	1981_122
	789_90	789	90	1355	1355_149			626_78	626	78			1841_184	1841	184	1841			1547_68	2390_126
	926_26	926	26	1379	1379_32			789_40	789	40			1913_221	1913	221	1913			1575_46	2441_130
	937_32	937	32	1448	1448_11			789_90	789	90			1981_122	1981	122	1981			1604_143	2734_84
	1063_193	1063	193	1547	1547_68			926_26	926	26			2390_126	2390	126	2390			1926_183	3106_72
	1355_149	1355	149	1575	1575_46			937_32	937	32			2441_130	2441	130	2441			1931_193	3138_195
	1379_32	1379	32	1604	1604_143			982_80	982	80			2734_84	2734	84	2734			1981_122	3193_138
	1448_11	1448	11	1726	1726_182			1177_224	1177	224			2777_182	2777	182	2777			1984_64	3589_200
	1547_68	1547	68	1926	1926_183			1355_149	1355	149			3106_72	3106	72	3106			2243_125	3759_186
	1575_46	1575	46	1931	1931_193			1379_32	1379	32			3138_195	3138	195	3138			2390_126	3762_85
	1604_143	1604	143	1981	1981_122			1448_11	1448	11			3193_138	3193	138	3193			2466_233	4337_232
	1726_182	1726	182	1984	1984_64			1547_68	1547	68			3589_200	3589	200	3589			2734_84	4555_85
	1926_183	1926	183	2042	2042_110			1575_46	1575	46			3632_150	3632	150	3632			2777_182	4773_177
	1931_193	1931	193	2200	2200_152			1604_143	1604	143			3732_23	3732	23	3732			3193_138	5456_219
	1981_122	1981	122	2243	2243_125			1724_64	1724	64			3759_186	3759	186	3759			3569_163	5665_165
	1981_134	1981	134	2390	2390_126			1841_184	1841	184			3762_85	3762	85	3762			3589_200	5869_112
	1984_64	1984	64	2410	2410_178			1913_221	1913	221			4084_182	4084	182	4084			3632_150	6186_127
	2042_110	2042	110	2466	2466_233			1926_183	1926	183			4337_232	4337	232	4337			3677_91	6272_186
	2200_152	2200	152	2734	2734_84			1931_193	1931	193			4555_85	4555	85	4555			3732_23	6286_178
	2243_125	2243	125	2777	2777_182			1981_122	1981	122			4773_177	4773	177	4773			3759_186	6450_185
	2390_126	2390	126	3193	3193_138			1981_134	1981	134			5456_219	5456	219	5456			3762_85	6567_12
	2410_178	2410	178	3385	3385_191			1984_64	1984	64			5507_206	5507	206	5507			4084_182	6847_86
	2466_233	2466	233	3529	3529_160			1984_218	1984	218			5520_204	5520	204	5520			4337_232	6994_51
	2734_84	2734	84	3553	3553_18			2243_125	2243	125			5657_68	5657	68	5657			4498_193	7068_152
	2777_182	2777	182	3569	3569_163			2390_126	2390	126			5665_165	5665	165	5665			4555_85	7141_19
	3193_138	3193	138	3589	3589_200			2441_130	2441	130			5869_112	5869	112	5869			4671_57	7742_211
	3385_191	3385	191	3632	3632_150			2466_233	2466	233			6186_127	6186	127	6186			4719_157	8391_228
	3529_160	3529	160	3677	3677_91			2734_84	2734	84			6272_186	6272	186	6272			4836_55	8539_62
	3553_18	3553	18	3732	3732_23			2777_182	2777	182			6286_178	6286	178	6286			5126_17	9320_35
	3569_163	3569	163	3739	3739_213			2846_71	2846	71			6392_119	6392	119	6392			5456_219	1177_224
	3589_172	3589	172	3759	3759_186			3036_70	3036	70			6450_185	6450	185	6450			5483_62	6713_146
	3589_185	3589	185	3762	3762_85			3106_72	3106	72			6567_12	6567	12	6567			5507_206	7872_119
	3589_200	3589	200	4076	4076_137			3138_195	3138	195			6761_21	6761	21	6761			5520_204	3_136
	3632_150	3632	150	4084	4084_182			3193_138	3193	138			6847_86	6847	86	6847			5657_68	155_101
	3677_91	3677	91	4197	4197_185			3569_163	3569	163			6857_125	6857	125	6857			5708_37	276_104
	3732_23	3732	23	4337	4337_232			3589_172	3589	172			6994_51	6994	51	6994			5869_112	278_73
	3739_213	3739	213	4498	4498_193			3589_200	3589	200			7068_152	7068	152	7068			6272_186	626_78
	3759_186	3759	186	4555	4555_85			3632_150	3632	150			7141_19	7141	19	7141			6286_178	926_26
	3762_85	3762	85	4671	4671_57			3677_91	3677	91			7742_211	7742	211	7742			6567_12	1547_68
	4076_137	4076	137	4719	4719_157			3693_32	3693	32			8391_228	8391	228	8391			6581_135	1926_183
	4084_182	4084	182	4836	4836_55			3732_23	3732	23			8539_62	8539	62	8539			7068_152	1931_193
	4197_185	4197	185	5033	5033_194			3759_186	3759	186			8695_216	8695	216	8695			7141_19	2243_125
	4337_232	4337	232	5126	5126_17			3762_85	3762	85			9320_35	9320	35	9320			7326_7	2466_233
	4498_193	4498	193	5288	5288_191			4084_182	4084	182			9905_95	9905	95	9905			7612_168	2846_71
	4555_85	4555	85	5322	5322_199			4301_161	4301	161			397_26	397	26	397			7742_211	3569_163
	4671_57	4671	57	5456	5456_219			4337_232	4337	232			1177_224	1177	224	1177			8539_62	3677_91
	4719_157	4719	157	5483	5483_62			4366_130	4366	130			6713_146	6713	146	6713			8695_216	3693_32
	4836_55	4836	55	5507	5507_206			4498_193	4498	193			7872_119	7872	119	7872			9320_35	4498_193
	5033_194	5033	194	5520	5520_204			4555_85	4555	85			3_136	3	136	3			37_156	478_182
	5126_17	5126	17	5657	5657_68			4671_57	4671	57			155_101	155	101	155			397_13	937_32
	5288_191	5288	191	5708	5708_37			4719_157	4719	157			276_104	276	104	276			1063_193	1724_64
	5322_199	5322	199	5869	5869_112			4773_177	4773	177			278_73	278	73	278			1726_182	2777_182
	5456_219	5456	219	5924	5924_51			4836_55	4836	55			292_168	292	168	292			2042_110	3632_150
	5483_62	5483	62	6272	6272_186			4880_186	4880	186			626_78	626	78	626			2200_152	3732_23
	5507_206	5507	206	6286	6286_178			5043_141	5043	141			926_26	926	26	926			2410_178	4084_182
	5520_204	5520	204	6567	6567_12			5126_17	5126	17			1547_68	1547	68	1547			3385_191	5507_206
	5657_68	5657	68	6581	6581_135			5456_219	5456	219			1926_183	1926	183	1926			3529_160	5520_204
	5708_37	5708	37	7068	7068_152			5483_62	5483	62			1931_193	1931	193	1931			3553_18	5657_68
	5869_112	5869	112	7082	7082_72			5507_206	5507	206			1984_64	1984	64	1984			3739_213	6392_119
	5869_190	5869	190	7141	7141_19			5520_204	5520	204			2243_125	2243	125	2243			4076_137	6761_21
	5869_194	5869	194	7326	7326_7			5657_68	5657	68			2466_233	2466	233	2466			4197_185	6857_125
	5924_51	5924	51	7612	7612_168			5665_165	5665	165			2846_71	2846	71	2846			5033_194	8695_216
	6272_186	6272	186	7641	7641_177			5693_8	5693	8			3036_70	3036	70	3036			5288_191	9905_95
	6286_178	6286	178	7742	7742_211			5708_37	5708	37			3569_163	3569	163	3569			5322_199	397_26
	6567_12	6567	12	8539	8539_62			5723_53	5723	53			3677_91	3677	91	3677			5924_51	292_168
	6581_135	6581	135	8695	8695_216			5869_112	5869	112			3693_32	3693	32	3693			7082_72	1984_64
	7068_152	7068	152	8810	8810_159			5869_181	5869	181			4301_161	4301	161	4301			7641_177	3036_70
	7082_72	7082	72	8843	8843_205			5869_190	5869	190			4366_130	4366	130	4366			8810_159	4301_161
	7141_19	7141	19	9320	9320_35			5869_194	5869	194			4498_193	4498	193	4498			8843_205	4366_130
	7326_7	7326	7					6186_127	6186	127			4671_57	4671	57	4671				4671_57
	7612_168	7612	168					6272_186	6272	186			4719_157	4719	157	4719				4719_157
	7641_177	7641	177					6286_178	6286	178			4836_55	4836	55	4836				4836_55
	7742_211	7742	211					6392_119	6392	119			4880_186	4880	186	4880				4880_186
	8539_62	8539	62					6450_185	6450	185			5043_141	5043	141	5043				5043_141
	8695_216	8695	216					6567_12	6567	12			5126_17	5126	17	5126				5126_17
	8810_159	8810	159					6581_135	6581	135			5483_62	5483	62	5483				5483_62
	8843_205	8843	205					6713_146	6713	146			5693_8	5693	8	5693				5693_8
	9320_35	9320	35					6761_21	6761	21			5708_37	5708	37	5708				5708_37
								6847_86	6847	86			5723_53	5723	53	5723				5723_53
								6857_125	6857	125			6581_135	6581	135	6581				6581_135
								6994_51	6994	51			7326_7	7326	7	7326				7326_7
								7068_152	7068	152			7612_168	7612	168	7612				7612_168
								7141_19	7141	19			7685_128	7685	128	7685				7685_128
								7326_7	7326	7			7904_83	7904	83	7904				7904_83
								7612_168	7612	168			8191_174	8191	174	8191				8191_174
								7685_128	7685	128
								7742_211	7742	211
								7872_119	7872	119
								7904_83	7904	83
								7904_103	7904	103
								8191_174	8191	174
								8391_228	8391	228
								8539_62	8539	62
								8695_216	8695	216
								9320_35	9320	35
								9320_69	9320	69
								9905_95	9905	95

## Sheet: 97SEQUENCES
	# Catalog ID	Consensus Sequence
	3	AATTCACTTTGGATACTTCGTCAGCATAATGCAGTTTCATATTCACAGACTGTTCAGAACTGGCCATCAGATGGCTTTTAATAAATGAATAGCACTTAAAATCTTAAAATGTGGGACTATAACACACAGTACAAATGCACAGAAACATGTATAATTACTACTTTTTCTATTGTATACATCATGCTCTCCTTTCACTATTAAAACTATGATACTGGTTAAGCTTAAAGTAACAGTGTGTAG
	36	AATTCCCACGAGTAAAGATGTGCAGTATGCATGGGTAAAGTGCAAATATGAGTGGGAGGAGATTAGAACTATCAGATGTAAAATCAGAAAAACAACATTGTCGAGATTGAAGGTGTAAGATAAAGACAATGGCAGAGAAGTCTCTCAGTTTCATCACGAGGTAGATTAGCTTGCCCTGCAGCGTACGGACCGTACAGTGAGTTACAGCTTTATGCGTTTGGTGGTTTCGCTGTACATTAC
	155	AATTCAAAAGTGCCAATTATTGGTGACTAATTGCACCAATTAGAGATGAAGCCACCTACATTCATGTTCTGTGGTCTATTGTTTGGCAGAAAATCAAAAGACGAAAACATAAATCTGCTTTCCAGACCGACCTCACTGAGAAATTAGCGTTGCTCTCCATTTTTTCACCCCCTCCCAGTTTCCACTTAGACAGTTTGACACAAATTGCACCGAAACGAAATCCTTGGAGCCAACAACTCA
	276	AATTCTTTTCAGCATTTACAACATTTCCCACAAAGGGCTCCGAACACACACACACACACACCTGTGCTGTTTTTTTATTCTCTCATTCGTTTGTGGGGCTCAAATTGTTCTACATGGAGAAATTACGTTTATATGCAAAAATTCATCACGACCCAATACACCCATAACCATCTGGTAAGAATCAATATGTAACTGGAGCAAAATCAGAACAATTAAAGCAAGTATGAATGGTTGATGCCA
	278	AATTCAAATTCCCTCCCATGGATTTATGTCTGCCGCCAGGTCTGAACAGAAGTCCTAACAAAGTCTTCCTCTGCTACACAAACATCTCCCTCCTAGTGTCGTTACAGTCATTACAGTACACTATTAGATGTGCGCTTGTAAAAATAAACTGTGTTTAACTCCGTAACTGCACCTATTGTGTCTGGCCTTTCACCATTAGAACACACTGGGCTGTGGAATGTTTTCTTCTCTTTATCTTTC
	292	AATTCAACAAAGTTGTCCTACGGTAGACATTGAGATCATCTTTGCAAAATTGCAAGTCAGTGGAGTCAACGTTACCTGAGGTACGAAAGTCTCCGTACATGCACAGCACTTAGAAAAGAGCACCCGACTGTTGCAGCTTCACTTCTATGTTAATATTGAGCAAAATTTGAATTGAATTTGGTTTGACTGGTTAACATACGTTAAGGGATCTTAATCTGAGTAGTAAACTTGTCTCGCTCG
	397	AATTCAGAACTGAGCTATATCTGATCATGTGGCTCTAAATCAACTGTGTGGAATTAAACAGATTGTAGATAATGAATTATACTAAGTTTAAAATAAGATGAATTTCTTATACTTTTTTTCAGTCTTGGAAGGTTGTTCTGATATTCCCCTATTGAATATAACCTAAATTAACATTACTAATGGATTTAATGAACATTTTTAGTTTGTTGTTTAAAATTTAATGCAAATTTAAGTAAAAAT
	436	AATTCACTGTTAAGACTCTAAGAAAAAAGGAAATGAGCAACCTCATATCCAGTGAAAGGTGCTATTTTTTCTACATCTCAGCAGTGCCAGACTGAGGTCTACAGCTTAAGCATAATGTGCATTTAATCAGAAGAAAGTGGCCCTGGTTGAAACCACTCTTGATTATAATCACGCTGTGACATAAATAGCTTTTTTGCACCAGTGAACGGGTTACTCTGTATGATGCTTGGGCATCCATTT
	478	AATTCCTCTACGGTTAGCGCGATGGCCATATAGTCCACCTCACTTATAACACTGTACAGTATATACACAATATTATTATTTCTTTAATGACAAAATAACCTTTAGATGTACATACAGTATTCCTCGCCCTGTTGTCAGAGAATACAGCCACGGTATTAGAAGTAGCAAGCAAGTGTTGTTGTGTTTTCTTTGTACAAATAACCCATGCAACTCCCCGTATACATTATTTATTTAAGATAC
	499	AATTCAGTTGTGTCGCCAATTTACTGGGTTATATATGTCTGAATGCAGTGCATGAATAAATGTAAATATGGGTCTATGGGCTTTCAAAGCACTCTTAAATGATAATCATAAACCAATGATCTGATGGGGATTATGGGTTTAAGGCATCAGAAGTCATCACACCGTTTTTCTACTGCGTTTTATGCATTAAAGGAATTATGTATAAAAGAATGTTATTTGCAAGCCTAGTGCTGGCAAAAA
	626	AATTCAAAGAAGCAGGTTTCTTTTCTTTTCAGTTATTTTACAACCATGATGATCAAACAGGATACTTGTAGTTGCTTTACTGTCTCTGTCTTCTTCATGTACACACATTTCATACTTTTACACAATCATAATCTACTATATATGACATTCATTAGCTGAGAGTCATCCTTATCAACATACTTCTATTGCAACCTACACACTAAAATCAGAAAGAAATGCCAGTATAAGACATAAACAGCA
	789	AATTCAGGAACACCGTATTGATAGTCAGTGTGCCTCCACTTTGTCCAGTTTCTTTTCATGGGATTTACATGGAAATAGCTGAGCTTGAGCCATGTGTTGATGTGCACAGCGAGGTCTGAGACAGAGGGAGAGTTTTTGTCAACTTTATTTCTCAGAGCAGTAAAGCTTTAACCATGTTTCCATTCACATATTTTTATGCACATTTTGAAGTATCACATTGGAAAAGCTGTATGGATATGG
	926	AATTCCCCAGTCTAAAATATGTTATTAATTTTTTCTCCACAACCATCTTGCGACCCCTAGAATCGATCTTGCAAACCCCTTGGGGGTCCCGACCCCCAGGTTGAGAACCACTGCCTTAAGCAACTCTCCCACAGCAACGCAGCCCCCTGTCTTGTTTTAAGGGCTGTTTTCAGTCTGAATGCTGACTAAGCCTTCAGTTTCTCTTTCACACACACATTAGATTTAAAGGTACTGTTTGTA
	937	AATTCAAGTGAGAAAAACAACAAAACTTTTTCCTACAGTGGGGTTTCTCTCCTAATACGACGTAACATCTTTGTTTTTGTTTTTTGGAGTCCAAAAAGGATGTTGAACTGGTCAAATAATTTCTGAATATTGCTTGGTTAGTACAGTGTACTTTGGTGAGGGCAAAAGATGAGGATGGATCCTGGTGATACAAGAAAATATGCTCAACAGTTTGCACTATGTTTCATCCTTGTTGTTTTA
	982	AATTCACGAGCGCGAACGAGAGTTGGAGAGATAACCGAGAGCTCATCGGGGGACGGTAAAAGAAGAAAAATAGAGCTTGTAATTTGAATGGCTTGAGCCGTCTCCCGTGTGTTTGTCTCATTTTCTTCACAGAGGATGCCCACGAGGTAACGTCGGGGTATAAACAACAGATGGTCCGCTTTATCAACGGCGAGCACTCAGCTCCTCCGCTCAGCCCTCGTGCTATTCTTTGAATTTAAG
	1177	AATTCTGTGATGTAATAGTTCTCTCTCTGTTTCATCTTTTTATATCTTGTGCATACAAAATGCATTTAAAGTGGCAGTAGGCGGAATGTTTTTGGCATCATTGGGCAAAAATTCCATAACCTTTCAGCATATTGTAATTCAAAATGAGAGAAAACTAGACTTCTGCACCTCCTCATGGCTCTGTTTTCAGGCTTTAAAAAATCCAGCCCGTGATGGGAGACTTTGGCCAACCACAGGTCA
	1355	AATTCATATGCTAATTATGATAATTGTACACAAATGTCTAACAGGATGAAATGATGAAGTGATGACATTTTGGACAGATATGCATGTAAACTGCAACTTGACTGGTTGGTGGAGGTATACAACCGCGAGGCGGTAATTCTAGTTAAATCGGTGACGCCAAGAACAAATGAAGATATGTCAGATTTTTAAAAAATGAATAGCAACGAACACTTGGTTATTGTTACCGTCCACAACCTTGTG
	1379	AATTCAAAACAATCTCTTTCTCTCCCTGCCAGTCTCGTTCTCTCTCATTCATAGTCTCCCACCTCTTTAAGCCTTCCTGTGCATCTAATATCTACCTGTTTATAGCATGTACTATATCAGTTACTCCTAAAAATTCCCGCAAAATCCACCGCTGTTTAGGCCAGAAAACACCCCAATCTCTGTTTTGTACGATCAAAACGCTGCTCACGCTGCAAACACTGCCTTTAATTCCATCACCTG
	1448	AATTCTTTAATATTATCGATTTTCATGCTCACATTCATGTAGTTTCAAGCTAGGACATTGAGGTCATGTCCTCAGTGTTGTTTCTGGAAATTTGGTGATATTAAGTATGGGAGGACAAGTTTACATTTTACATTTAAAAACGCATTACACAAGGTAGTTACAATTTACAGGAAATTTGCAAAAAAATGACCCCAGTGGGGTAGCATTTGATTTCAACCTCCCCATTTAGCATTCTTAAGC
	1547	AATTCAGAGAACAAGTGGAGTTTAGAGAATGACTTCAGTGAGGTTCTGTAAACTAGTAGAGGAAGTAACAGCAGTGTTGGTGTTATTCCTGTCTCAGCCATCACCCCCATCCTGCTGGACGCCCTCACCGATCCGTCCAGGAGGACTCAGACGTGCCTGCAGACGCTGCTGGACACCAAGTTTGTCCACTTCATCGACGCCCCGTCCCTGGCCCTCATCATGCCCATCGTCCAGAGAGCC
	1575	AATTCAAGGCTTTCCTGGGTGGCTTTCCAAGCCGCTAAAAAGGATGGTAGAGATCTCCACGTCGTGTTCCTGGACTTCCTGGGTTCCTTATAACATCTTTTGGACTGCACTCAACTACTTCAGGATCCCAGAGGCTATCACTTCCCTTGTCAAAACCTACTTCTAGGACGTGCAGCTGTGCTTGAAGACAGCTTAGTACACCACGGCATGGCAACATCTGGAAGTAGGCATCTCGGCATG
	1604	AATTCAATTCTCATTGTTCGGCACATTCCTGTAAAAACACTTAAATAGTGATGCACATGCATCTTCTTTTAACCTGCTTGCAGTTTACGGTTGTGAAAGAGGTCGGTGGTGCTTTTAGTGTGTTGTTTGGAGTCTGTTTGTTGCCACCTCTGCATCATGCCCCACCTCCCCCCTCCGTGCAAGTGCTAAGCCTTTTGTGACTGCTGTTAAAGGACCAAGCCGTGAAGGACAAAGCCCTCC
	1724	AATTCCAGACTTGGATCACGGCTCAAGTAGCGGGAGCGAAAGTTGGCTTTGTGACAGTCACCCCCAGTGGCACCGATTCAGACAACAGCTTTAGGTGTCCCAGGGCACTCTTCAGAAATGAGACCACAGCAGCTCCAAATACAACTTCCACAGCATCAACCGTTGCAACTGAGCTTACATTTGTTGTCAGCTTAGTGACAGTGGTCCTGCAGCACATTGTAGCTCCATAGTACAGTTTTG
	1841	AATTCGAGCTAACTGCTATCTGAAGCTTTGTCCGTCTTTGAGAGCCGTCGCCTGCGAACTAGTCTAGGGGAGGATGAGACGGAAATACAAGTCTTCTATTTCCTTCAACTTTGGATTCAATCAAATAAACAAGCTATTGAAAAGAACACAAACTCTGTACCATCAACGTGATTGACAAGTCCTCGGGGCATCTCTACTTCTTGGTCCTCTCATGTTGGACTGAGGGCAGACTGGACGCTA
	1913	AATTCATTGACAGCCCTAAATAAAACATAAATAGCTAGCTAACACCTAGCTAGCGAGCTAAGGCTAACTAGCATAATTGCCTCCACATATAAACACATTAATTCCCAATATATTGTAGGTTAAATGTAACCTGGTGGAAAACACAAGTGGCCAAACTATCAGTTTATTAATCAAACTGTCCCTGAATGCTCAATAAAGTAGTTTTAATAGTTAAACTTGCTCGACACTGATGATGCTAAC
	1926	AATTCAAAGTTCGCTTTGCTTTGCGGCACAACTGACTGACATGTTCTTCTGTCGGTCTGTCTTCATTTCCGCTGTTTCAGTACCCAGGACAGTCTATCTGTCTGAGAATAACTAATAATAATGAATGTTGAATATGAATAATGTTATGGGATTATTCCTTATTTCATGGGCTGCTTGTTAAACGAAGTATTTGAATACAACGGCAACGGTCGAAGCTTCAAGGCGTTCGGGTCAGCCCTA
	1931	AATTCATTAGATCACATGATCGATTTCTTTGTGTGTCATTCTTTCAGAGGACACTGCTGAGATTTTTGTTAATATTTGCGCCGCCTCCAGCAGGTACAGTTTGTTTTTCTCTGTCGCCTAGTCGCTTTGTTCATCTGAGTACAGCCTGACTACTCGTGTAGCCGCTCCTTTGGCAGACCTACATATGACTGATCTACATACAGAACTAGGCTACATAATGGAGCTGATTCCAAGGCTGCG
	1981	AATTCTAGAGATTCCAATAACAAGATAATCTTACAATAACAAGATGATCTGGTGAAGTTAATGTTTCATGTAAAGGACAGGGTCTCTGTTGTACTCCCGTGTTCACAACGTTCGTGTCATTTTCACTGTACAGACGTAGTAGTTTTAAGCCCAACCATGTTGATTTTTCCTAAATCTAACTAAGTGGTTTTGTTCCCTAAACCTAAGCAAGTGTTTTTGTTTAATCCATAACAGTAAGCA
	1984	AATTCCTCTGAACCACGAGGACCCCCCTGCCACTTAGGTTCTCACGATCCCCGCCAGAGAGTCACGCTGCTGTGGTCCGCTCCCTCCACGCACAAACAAAAACACACACAAACGTGTCACGAGTCGACGTATGTTGTATATACACAAAATAAAACCAGGTCTTCCTCCAGCTTTCTCTCTGACGTCCTCTCACAGCTGCTCTGCTACAAGTATCAGGCCTGAATGTGCTTTGTGTTCACC
	2243	AATTCTCTCCTCATGTGAACCATTGCAGTCAATGGAAATCAAGCATTTTTAAACATCAGTTTGTCACTCAATCATTATAAAAAAAAATGACAGACATCTCTGTGTTGTCTAGATGAAGTACGCAAAGTCTCAGAATTTTGTCTCAAAAACTGAATTTTTAACAAGTTTGAAATCTGCCTTCATAGTGGGAAGTCATAATATGATATCATAGTGTGATGTCATAGTGTGAAGTGGTAGTTT
	2390	AATTCACTAGTCTAAATCTTTCCAACAGTTTTGTAAAGATACATAATGATATTTTTTTCAAATGATCTCACCGTCAGCGTTTAGCTGGATAAACTAAGGTAAATATTGTTTTATCCCTTTTGGTTTAATTCCATGTTGTGCATCACTTTCTACAGAAAAATCGGACATCTTTATACAGATATTACTCCGCTGACTAAATTCAATTAAACTTTGTTGTCTTACTTGCGTACAACAAATAGT
	2441	AATTCCTTTTTTTCCTCCTAGATTTTTCTCTTCAAATTGATATAGTGTTTGTAATTTAATGGACATATTTTAGCGGCTGTCTGAACATTATTAGTGGGGAGGGGGGAAAGGAAAGGAGGGTACTTATACGTTTTTTTTTGGCTGAGGGGAGGGAGTCTAACTTTCCTTTTAACTTTTTCCTCATTGTGTATTTATTGTTTTTTTTTCCAATCTGGTCTCCTAGAAATTACCAATGGTTCT
	2466	AATTCAAACATTTACATCAGATTTAACATCTGTTCAAACAAATCTAAGGAAATGTCCTTTTCTTGTCAATGTCAAAGCCATTAACAACTCACATTTTAATTCACAAAACTGGATAGTCAGTTAGGAGTTGCAACAGTCAAACAAGAAATTACATTTTATGAAAGAACATATGCACAAATTGACAGTAAAATCCTGATGTTTGTGTTGCAACAGTTTGTCCATCTGCTCGCGTGTGCGTCC
	2734	AATTCGGCCAGACACTTTATAGCACTGAAAAAAATATACTGCCAACCACGTTTCTTTGTATTTGTGTTTACGGTTGGTAAAGTTCCTAAAAAGATGCTAGAATTGACCATCAGTCAAAATAAGTTAGTTGTAGTAAACATTATCCATCAGAAATGGTCACGTATCTCTAGAGAAAACAATTGTTTTCATTTTGGTGTCAGGATGTGTGTAATTCAGGTACACAACTAATCTCAACCAGCA
	2777	AATTCTGTCCACAGAAAAAAAATGCTTCAGGGCTTTTCTTTTGAAATGAAAGCAGGAAGTATTGATTTAAAAATAAGTCTTTACTTTTTTTCATCTCCATAACATTTTCTACAGATATAGACATCGAAACTGTAGTAATGTTGCTGGTATGATGTCAATATGCAGTCAATAGATCACTTTCACTGTCTGTTGTTGCTGTGAACTGCGCACGGCTCGCGTCAAAAATAGGCAAGACCTCAA
	2846	AATTCATCTGGGGTCTCATTTATAAAACAGTGCGTAGGATCCATACTAAAAATGTACGTGCGCACAAAAGCCGAAAATGGCGTACGGCAAAAAAAAATCTGATTTATAAACCGTGCGTACGCACATCTGCACGCAATGTTCCCTTTATAAATCACACTCCACCTGGAAATGTGCGCACGTGGATCCGCCTCATATTCCGCCCTCTACACGCCCACATTCAACCATAAATGGTCCATGCAA
	3036	AATTCCCCCACACACCATCACACAATACCTGCACACACAGCAGTGCAGATTAATGTAGGAATATGCATTTGATGTCTTTTTTTTTTGTAGGTATTTCTTTTAATTGATTTATTTTTATTGATTTAAAGGGACTATTTGTAACTTTCAGAAATGCTTCTTAACAGCGACACCTGTGGCTGTGAAATCAACGAAAGTCAGCGTCGGGCTCACGCTTGCGCGCTCTAAATATACCTGAACGAG
	3106	AATTCACAGACGAAGAAGATTAGTTGACAAATTTGCCACATTTGACTCCATGCCATAACGAGAACTGCGCTCGGAGAGCGCAGACCTCCGCCAACGCGTTACTTCAAAAACAGATCACAGCTCACAGCTCACAGCTCACAGTTGACGGTACCGTGAGTTGGTCGGCTTGTTATTAACACGGTGTGTTTCCGTGTAACGTATCAACGGATGCCTCTCTCATTCAGCAACAGAAAAACCTTG
	3138	AATTCTATGCATGCATTTCTATTACTCCTGTGTCCTCTTTTAAAAAACTCATTTTTATAAAGTGTTTTTTAATTAGACATTGAATAAAAGCATAAAAGAAACTCCTTGGCTGCATTGCACTAATTTGTAATTGCACGGTGTACTTTCTGTTTTTTATGTTTCTGAAGCACATTGTAAATTTGTTTTCAAAAAGTGCTATATAAATAAAGATTATTATTATCGTTAGGCCTATCGATTTCC
	3193	AATTCTGGATTTCAAGAATTACATTTAAGGGTTCAATATGTTTGTGCAATAACCTGGTTAATATCCAGTTTTGAAAAGCTCCGCACTGGGACAGTAATAACAGTAGCAGCAGTGTGCTACTGTAACATTAGCCAGCATGTAGGCTCCTGCACACTCATAATTTATCCAGCCAAATGTTGGCTTTTGTGCTTAGTGTTTGATTTCTGTCAAATATTACTGCTTCAAGAGTTATTAATGATG
	3569	AATTCACTTGTTACCACAGCTACATTAATGGATCTGTCAACACAATGCTAACATGCCATGGTATACAGGATATTGTGTTATAACCTTGTCCGTACATTAGTTACAGTGGATTTGTATTAAACAATACCACATTGGTGGTAGGTTTGTTTTTTTTACATTACTTCCCATTAGCTAATCGAAAGAAATAGACCACTTACATTCATCTCACATACTGTACTGTTTACCATTCAGCCCTGTTTC
	3589	AATTCCCTGACAGATGCTGATTAGAGCAGCAGCAGCTTGTGAAAGATACTTAACACTTTGGACATAAACAGGATATATACACACACACTACTTCTACGTCTACTTCTAATAAACCAGAAATCACTGCTTGACCAGTCGGACTGTTCTGATGAGGTTGTGTATTCTCTAGAGCCTCGTGAAAGAGATGCCTGCAGGCCACACAGCTGGAGCACATTGTGAAGCTTCTTGATTTGTATTTCC
	3632	AATTCCTATTTTGGATGCAAGGGAATGTAATAACCCCAAAATAGGACATTTGATTGACATTCCAGTTCCTCTTATTTTCGAGAGAAACCAGATATGAGTTTTGAAGTTGATCCAACTTTGGATGACGTAATGGGCGAGTGAACTTTTTCACATCAACTTTCTTTTCAATCTCAGTCTAGTTTACCGTTTTTGAACAACTGTTAAGGAATGCGTTCCCTCTTCTCATCAGGGTACCTACAG
	3677	AATTCAACGTTGATTAGTTTGTCACGCAACTTCCGTACTTAAGTAATGCCACTTAACCCAAACCACAATCTTTTCCTGAACTTAACTAAGTTGTTTCCTGCGAAGACGGAAGTTTATTTTGAAAAGACTGTATGCATGTAACGTGCGAAAATTGACACGTGTTGCTGAAAACCAACACATTCTCATCCCAACTCGTCACATACCGCCACTGTGTCACGCCCCTTGGCGTCACTTTATTTT
	3693	AATTCCAATAACAAATACAGTATATACATGCTTAAAGCAAGCATATTTTCCCTCTCCCATGTTAATAAGAGTAATAAATACTTGACAAATCTCCCTTTTAAGGTACATTTTGAACAGATAAAAAATGTGTGATAAATTTGCGATTAATCGCAAATAACTATGGACAATCATGCGATTAATCGCGATTATATATTTTTATTGATTGACTGCCGTAGCAATAATCCAGAATTACTGAACACT
	3732	AATTCTGTTGTATCCTTACACACACTCTCTATACTTTGGTTGTTGGATAGTGTGTGTGTGCTTGACTTTTGTTCTGCTGTAATAGCATTAATGTCACTTCAAACTTTATTCTTATTGGGGCTAAACACAAATGTCAAGCCAATGTTCTCTCCCCAGGATAACGGCCCGAGTCTGTTGGTTGGCTGCTGTCTGTTTAGATAGAGCAGCCATACAGTTCAACCTTGTACGGGTGAACTCGTA
	3759	AATTCATTTTCTTCTCTTTTGAGGCAATTCTACATGTGTTGGTAGAGCAGGAAGCCTGTTAACTTTTCATTTTGAGCATTTAGCTGAAAGCACCACTGTGCCTACGTATAGCCTAGCTGTAGACTCGGTTTCCAAGTTTCAGCAGCGCTGTAAAAGGTAGCCGTTATTAGCTCTGGGAAAAATAATTTCAATGATTTTAATCCTCAGGTAACGGCGATGTTTTAGTGTCCTGCATGCATA
	3762	AATTCCGATCAGCCTGAGCATTAAAACCACAGGGTATAACACATGCGCAGTGTAGCTGACGATGCGTTGATGACGCATGATTCGGCGTTTTTTCACATTAAACTCAGTGAAATTAAAGTCTAGTTCGACCAAAGCACACTTGGTGATTGTCGGAAAGAGTAAAGACGATGGTTTAGGTGTTTTTTTCATCCTTACAGCCCTTAATGCAGACAACCTTTTGTACCTTTTTATGTGAAAACT
	4084	AATTCATTTTTTAACAAAGGAAGAAGAAGTGAAAGGAATCGTTCAACATTTTGGGACCAATGTGGTTAGCCTAGCTTAGCATAAAGACTGAAAGCAGGGGGAAACAGCTAGCCTGCACTAAACTCCTCGTTAAATCAGTTGTTGTTTTGATCTGTCACTTTGGAAGGTATGTTGTAAAAGTGCTAATAATATATGACTTAAAAAACCCTCTAAGCCCAGCAATAGGTGAAGGAATACAGT
	4301	AATTCTACTTTGATAACGCCCGTCAATAGAAGAGCTTTTTTCCCCCTGACCTGACCCGCCAGATCAACACGTTCTTATCCCTCGTCACATACTGACTCTTTGTCAGACCCCTCTGCGGTATTTGACGCCCTGGGAATGATGATGAGTTTGTTACACAGAACCATCTGAGAAGCCGTCATTGGAAACTGTTATAAAAAATACTTGGCAGGTGATTGGATGAACTATCTATCAAACAAACAC
	4337	AATTCATCTTGTCAAGCCAGCTACAGTGGAGGAAATAAGTATTTGATCCCTTGCCGATTTTGTAAGTTTGCCCACTTACAAAGAAAAGAACGGTCTATAATTTTAATGGTAGGTTTATTTTAACAGTGAGAGACAGAATATAAAAAAAAATCCAGAAAATCAATTCATATAAAAGTTATAAATTGATTTGTATTTGATTGTGGGAAATAAGTATTTGATCCCCTAGCAAAACATGACTCA
	4366	AATTCTTAATTCGGGTGGTGTTCCCCTTTCTCCAAAATATTGAAATGGTGTGATGTGAAAGTGTGGGTGATCAAGTGATGTTAGAAGTCACACAGTCAGCAGTTCTTTAACCATTAGTTAACAAACGCGTGGCCAGAGCCATGTGGACATGCCTTCTCTGTGCAGTTTCCAGTGTTGCTACAAGCCACATTTCGTGTGTGTGTATTGTGAGGTGGCGTCCAGATGGCCCTCACAGATGGA
	4498	AATTCCTGTTATGCCTTTTTTCATGCTTGTTTTGCTTGTTAAATATATTCATTCAAATCACCCCAGAACGAATGTGTATTTTTAGTTGTCCCTTTCCTTCTCACTGCTATCTGTTCCATTGCTTTTTGCAAAAAACTACCTGCAATGCAGCCAACCACAACTGAGGTTTTACAGACAGATTATCACAGGAAGATATGCGAATACATGTGCTGTAGTCAAAAAGGCACGCACACACAAACT
	4555	AATTCATGTTGCTCTTTTATATCTTCTCTTAAATAATTCATAATTTAGTTTAATCTTTTTTATTGCTAATCTATTTTTTTCGAGTAATTTTGTCTCGTGTGTAACATTCATTCACTCATTCATAACATCAATAAACACGTGTGTTTCTGTGTGTGTCAGTCTGATGGAGGAGGTGAAGCGTCCTCAGGTGAAAAGGACTCTGGGAGTTCTGCAGGTCACCAAGTCCAGAACTCTGCGAAC
	4671	AATTCTGTCAAGTACAACAGTGTGAACATCCGAACTTGTAGTTATTACTGAAAAATTAATGATTTCTGTAGCTGCTCTGGAAGCCACAATTACAAATGCAAAAAAGCCTTCAAGGTTTGCCAGAGCTTATTGGTGACATTCTTATGTAAACAAACATGCATGTAAACAGCAACGGGCAATATCGAGGTCAGCAAAAATGGTCGAGGTCATGTTCGTATACTGTATCGTACGATAAGTTGA
	4719	AATTCATGCTATTGCTCTGCTTTTCTACAAAGGCCGAGGCCCTGTGTGATAATACATAACCAACATAAATATGATGTATGAATGACCTGTAGCCTCCTAGGGAGCGCAAGGATGTCTTGTTCCTTATATTTTTAGATTTAATACACGCCAGACGGCATTAGTTCTCCCTCTTGGGGTGATGTCCACATCAAGAAAATTTATATTAGCTAAAAATTCTGTGTCTGGCATGCCTGCTGTGCT
	4773	AATTCACTTTCTTCCCCCAAACTTCAGTGAATCACCTTCAGAGTGAAAGTCCACACAGGCTTCGACGACGGAATTTATCATTTAAAGATAACAATAAGTGATGTGAGTCTCTAAAACAGACAGATATTATAGAGATTCATCATCACACTCCAGCTTCTAGCTTTTGCTTCAGCCTAAGTTCTGAAAACCCACGGATCCTCCTTACGGAGAGCAGCGATCAGAACTGAGCTGGCTTTAGTT
	4836	AATTCTCCTGTCATGTGTCATTAAACCACTGCAGAAGAAGAGGACACACTGAGATGATGTAATTACATAGAGCACCTGTCAACCGTTGGGCGCTACCCACATAATCAGCTCTGTTTTTCCCGAGTTTACATCATTTGAGGAAGGTTACAGTCTCCTCAATCGCACCACAGTTCTGATGTTTAAAATGTCTCTCATTTCTTCTGGTTGTATGAGAGCATAAAAAGCCTTGAGTTGTGTTTT
	4880	AATTCGATGGGAGAATCTCAGTCTCAACAGTAGCTATCCTCCCCAATCTGTGAGCGATGGCAGTTCTATCAGATCCAGACTAATTGGAAGAGAACCGAACAGTAATTGAAAGTGCAATATTGACTTGTGTCTGCTTGTTGCCACTAGCCTGGACTGGCTGGCTGTAAAGCTGTGGATAAGGGGGGGGGGACCCTTAGTCTGGATGACATAAGTTAAGGGTTGGTTGGTGAGGACAGGCTG
	5043	AATTCATGTTTTTTAAAAATATATCAAAAAGGTACTGGCTCCTCATGCAATGGTTTCTCTGTAATCCCATTGCTGTTGGACAGGACCCCCCCTGGGAGCTCTCAGCTCAGCAGGACTCATTCTCACAGTTACAGGGACCATCGCTGCATCCCTTTTCCCCAACAACACAGGCTTTGGTTTGGCCCTTGAGATGACTGTGCTGTTAGCCATGGAACTACCACGAGGGCAGCTAGAGACTCT
	5126	AATTCACCATCAAAAATTAATGCTTATTGTGGTGAAAGCAGAAACACCAGTAAAGCAGTCTGCATTCATCTATAAATTGATATGAATGATTCTTGCAGTATCTGTATCAGCTGCTTTAACTCTTTGAAAAATGTCTGAAGGCAGCAGGACGGACATGTTAACAAATCTGCACATAAACGGATTCATCAACATTTCTCAGTATTTATTTCTATCATGATTGTACAAATCAAATCAAATCCC
	5456	AATTCTTGATTTTGACGATTTTTTGATGTTTTTACCAAGTTGCTGGTGTACGATTCATTATTTTAATAATAAATAACAATTCAGTAAATGTATATCTATGTATTTATTTGTTATATTTTGTCTTACAACGCCTGATATTACCTTACACAAAATAATGATCCCAGTCCCTTTCAAGCAAACAGCGTATTAAATAAACACTGGTATCGGATCGGTTACTCCATGTCGGCCGATACCCAAAAG
	5483	AATTCTAACTGTTATGTTGGTAACTTTTATCTCATCAAAGCCCACAGAATCCCACTGAGACAGCAGCCTTTCTGTTTCAGAGCGACCACTCCTTCTTCTCTGTTGCTCTCATTTGGACTGACTGTTTTGATATTGTTGGTGAAATCTGACTCAGGAGAAAAAGGCTGGTTAAGATGCAAAAGACCCTTTATTTGCATAAAAGATTTAAGCCTTGCGTCTCTGCAGTCAACACAAAATTGA
	5507	AATTCCCATTCTTATTACTTGGAACTTTTCCCTCCATCACCAAGACTTCCATTGTTTATCCTAACATTTTTCCTGAAAGACAAGCCTGTGCCTCAAACATAGCCGCACATCTGTCTAAATTCATTTGGTATACCTACAATTTCCACAGAAGATGCTTCTCTTTTCTGGCTCAAAATAGGACCTGACTGATCCTAATAACAACCTTGCGTGTTAACATTTGGACCACAGCACGTTGTCATC
	5520	AATTCATCATTCAGCACACCTGGGTGTGAGCAGATTTGGATGGTTAAGAAGGTTTGGTGCATTTGGTGATCTCTTATTTTTTTCTTTTAACAGAAAATTGAGAGAAGTGGTGCATGGGTCAAACAAACACAGGACTTTCACCCAGGAGACTGCTGTTCGTATCCCCTGTGAAACCAAATGGCAATGTTCTCTTATTTTAATTTACATTCATAGACCCTGTTCAGACCTGGTATTAACATG
	5657	AATTCTAACTCACAACATTGACTACGGCTTTGTCCGAAATCCCATACTACGCTCTACATACACAATATATGTACTATTGTTCAACATACTTTTGTGTGAATAAACAGTAGTTTGTATCTGTTCGGACGCACTGAGCAGTAATTTACGTCGTCACTTCCTGAGAGCCTCCTCGCTGGTTGGAGACACGTAACCATGGTAACCCGTGCCAACCTCATGTGACCGAACAATGATTTGTGAGAA
	5665	AATTCATTGCACTTTTATTCTGTGACGGGGCAAGAGTATGAAATGTAGCCCTATGATGTTTAATGTTATATGTTAATGAGGAAGTTATATGAAATAACTTTAAGGTATAATCTCCTTAACTTAACAGGAAAGCACTGTATGTAGTGCAGACCCCCACCAAGGGCTAAAAGTCTCTTTGAAATATCATCAAGAGGTTTCTTGCAGATTCAAAATCACAGCACAGAAAATATAACGCACAGG
	5693	AATTCTTCAGGTCACGCTCACACGGGAGGCACAAAACCATCATGTGAAACCATGGGAAGAACAACACTGCAGACATGACAAGGTCTTACACATAAAACCACTAAGAAACGAAAAACCCCGACAGATACACAGGATGTCACAAAGGCACAGGGAACCGACAGACACACATACCAATAAAGCTGAGCTGGGAGGAAAGGGCAGGGATGAAGAGATAGGAGAGTAAATAATTAGCTGAGTCTT
	5708	AATTCAGTTGAATTTTACAAAGAGAAAGAAGAGGTATTGGGAGAGGAAATGAAACGATTACGAGAGCATCAGGAAACTCATTGAGGCATTTATCAAGCTTAATGAAAAGGCTCCATATGGACACGGCGCAGGTCAAATGAATAAGCTTTTAAAAATCAATCTCACCAATTACTGTCTGTCTCACTTGTGAGCGAGTCACGCTCGACTCGGCACCCAGTCAAAAGGGGCAGATGCAGGGAG
	5723	AATTCAGGACTTTTACTTGTAATAAAGTAACATTCTTTTGTGATATATATATTGTGATATTTCTACTTTTACTCAGGTAAAGATCTGAGCAGGCTAACGTTCCTTCTTCCACCACTGCATCTGCGTCCATTGTATCACGTCCATGCCACACAACCTCCATCAATAAATGCCAAGGTAAACAATACTACCTTCATATTTCAATAAAACTGTAACTTATAAAGTTAGGTAATGTAACGTTAA
	5869	AATTCAACCACACACCATCTGTCAGTCAAGACTATAATATATCTAGTTAATATGGAGCTTTTCATCTGAGTGTCGTTAATGGTCTAAATAAGTGCACATGGCCCAGGCTTAAATTACTTAGCTAACTTAATTTACACTTAATCTCATTATGGTAACCTCCAATGCTAGCTACCTAAAACAGCTAACTAGCCAGCTAATGAAAGCTAATCAGGTTCTGATTATTCTTCTACTCTATGGGCT
	6186	AATTCCCCTCGGCCTTCTGTGTCACCCTCCACTGCTTTTTACGGAAAACCTCATAAAACCAATGCATGACCACACTGCATGCAAATGCACACGCTCTATCACTGGTCCTCTTCTTTCTTTGTCTTTGGGTTTTTCTGTTTTTGGTTTGTCACATGCACTTATGTAGACACCTTCATGCACACAGACACCACCACATGGAGACAATGTGAAGGGAGCATTTTATTGGCTTCCACTCCCTCT
	6272	AATTCTGTATAGAGCTCCTTTAATGAGGAGTCAACCAAGGAGGTCAAAGCACGACACAGAAAGAAACTAGAAACTAATGCATGCGTCTGATGGGTCTCTGTGTGCTCTCTGACTGGATGTTTGGTTCAACCAGCAGCATACGGGACGCAGAGACTCTGAACCTCACTGAGAAATTTGGCAAGGAAGGCCGTCATTGTGGCCTGAGGCTTCAGCTCTGGTCAGAGGACGACTAGATGTGGA
	6286	AATTCAGAATAGAAGTCAGATTAAAAGTCTGAAAAGACTTTGTTGTGTGATTTCTTTTGCAATGAACACAGTCGTTTCTTGTCATTAAGTCTGTTTTTTTCATTAATTAAGCAGGTTAGTGGCCATATTGAAACATAATAACCACTTTATTTTATCTCAACAAGCAATAAATAATTTACCCCAATCATCCTCTGACATGCTTAAAGATGCTTTCTTTTCCATATTTTCGGCAAATTAAGG
	6392	AATTCAGAGGACTTTCCCTGAGACGAAACACTTAAACGTTTCATCTTGATTCTTTCTGTTTCATATTAACATTTCACGGCAAATTATTTGGAATGAACTATTGAACTATTGAATGTCTGGCGATCATTCCACATTCATTTCCAGTTGATCTGTATTTAGATAAATGTGTTAGAAACAGCACAGTATAAACCAGTCATTCCCGAAGACTGGGTTCGGGACCCACAGGTGGGTCGCAGGAGA
	6450	AATTCAAATCTATAAACTTGTATTCATGTTTGACCTTTTCAACAACGACAATATATCATTCTTATCGGTTAATGTCTTCTGCTACAAGAATCATCTTTCAAAGACAAGATTGCAGGTTGTTCGTCTTCTCCTCTGTCATGCTGCTGTATTCAATGCAGTGAGACAGTAAAGAAGACAAGAGATACAGTAAAGGAGTAGCTCGACAATTTTTGTGACGGGCTTATTCGGTACCACGCTCAT
	6567	AATTCACCCTGAGGGGGGTGGGGAGGCACACCGTTTAAAGGACATAAAGGAGGATCTAATGTTTCTGTCTTAAAGGTGCGTTCAGTGAGACGAGGCTCTCTGCTGACCTCTGGTGGCATCAGCTGTGTCTGACCTCTGACCTCTGACCTCTGGTGGCATCGGCTGTGTCTGCTTCAGGATCATCTGTTAGTCGTCTCAGACAGAGCAAAGTGACTCCAGCTGCCCAGCAGCTCTCCTGTT
	6581	AATTCACTTAAAACATGAATGAATCAGATACAGGGAAGGAAAACGCATCTCCTTTAACATGGAAGTGTTACTCTTACTGTGTTATATGTTCTATATTCCAGTAAAAGAACAAGAGGTCAGAGGTCTTTTAGAATCATGGGGAGGCTCAACACATCATAACATTAGTTTATATAAAGTATATAGATGATAGCAGGGCTGTCGATCCATTCAAATATCAAATCAAGATTAATCACACATGTT
	6713	AATTCTCGTGTCAGTCTTACACCTTCCAGTGCCCTGCAGCTCTCTGTATTCACACAGAACAGGACTAAATGAGACGGTTTACATCCGTCACATCAAAACGTCTGTTTCTCAGATTCTTCATCATTTGTTGTCAGTTCAGTGTTTCATCAGAAAAAGCAAACTGAAAGAAATCTTGTATAATCCACTCACTGGTCGGGTTAACAGCTGGTCTCTCAACCTTCTGACAGACCAGTATGCTGC
	6761	AATTCAGCATTTTGGCTGTTGCCATCTTGGTTTCTTGCAACCAGAAGTGACACGAGAGGGTAACTTACGATCTTAAGTTACGCCACTTCCGTAGTTATTTTAACCCAAATCACGATTTTTTCCTAAACACACACTATCCAATGCCTCACTTAGCATATGGTACTTCACGCTTAATGTATGACTGAAGGACAGCCAGCCTGTGGATGCTGATAATGGTATCCATCACGGTAAAATAAAAAT
	6847	AATTCAAAGACCTCCACATTGTCAAAGTCATCTAAATATTCAGCTATGACAGTGAAAATCTTTTCTATAACATGAAACTATGCTTTCTGTACTCAAACACTCACTTCTCCTTGAGCGAGACTCTTTCCATGATGGCATAGTTAATAACAATCAGTGCCTGTCATGGCAAAAACAAGCACTTTTAGTGGGTGTAAATGACGCTGCCAGCTTGCCCCAATAGCAACATATTGCAGCCTGAGA
	6857	AATTCACCTACAAGCACCTCTAAAGCTCACAAATTGACACGTATCTTTGACAGATTAATCCCTACAAAAACTGCGTGAAAATAATAATTTGCTGTTTGACAGGGGTTTATGTATTTTGTTGGTCAGGACTAGTTACAAGTCAACCAGCAGAGACCCAAGGAAGTTACTGTCCAGTAAAGACTGTTTTTTAAAACTTTTTTTAACAATTGAGGATATGATCTTATGGATATGGATATCCTG
	6994	AATTCATAAACTGATGTCAGATTTCCTCTGCTTATATGGAAGCTCTTGATGGAGAGCAGCAGGAAACTGTCCCTGGTGCTGAAAATGCCCCATTATTCTTGTCACTAGGGGGCAGAAAAGCCTCTTAATTTGTCGATTTGACAAGACTTGCTCTGCCCTCAGACTATACAGCAGCACATAGGTGGGGATGTGCCACATCCTTTATAATCCTGCATCCTCCACACTGTTAAATCCCTGAGA
	7068	AATTCTTTGTGTGTGATGAGGAATCTGTCCTACCAGCTATACACGGAGCTTCCTCCGTCAGTCCGACTCCGTCTGGAGGGACCGACGAGAGCCTCCGCCTCCAGGGAGAGCGACGCCATCGGCTGCTTTACTCTTTATAACAAGAAAAACACAGAGGTAAAGGTCACCACGCGTCATAAGATTATTACACCACCAGACACACCACTCCAAGCTCATGCTAATGTTGCTCTTTGTCTGCAA
	7141	AATTCAGTTTAGTTGGGAACGTAATTTTGCAGGAGACAGGTTTGGAAATTTGGTAGAGATATAAAGAGTTTTCCTCTAGCGCCACCATGAGGTTCACATCTGCACACATTTGATAGACGTTTCACCTATAGCAGCATCATCAGGTCAGAACTTTAATTTATCCAATATTTTTGGTTAGGGCCAAATATTTGCTATAACTATAACGGCATTCCCATAAGTCTAATTAGCAATTTACTATGC
	7326	AATTCTCCGATTTTTTTTTTTTCCTCAATGTGGCCCTAATACTCCGTCATACCGTCGTACCATAGACCTACAACAATGATGAATAAAAATGAATATGTAAACAAAAAAACAGTTATTAATTTCCATTTTTAAAAATCCACAGGGAGCCACTGGAGAGGAGCTACAGGTTGCTGACCTCTGGTCTGAGGCGAGGCCCACAGTCTCAGACCTTGAAAACCGCTGATCTAAACCATTACCTTA
	7612	AATTCTTTTGATAAGTCAGTGGAATTTTAACACTAAGACTTATTTGTTATTGTGTGAATGTTTTGTTTTGAGCAAAACACAGGGAACCCCCTAATTCACAGCCGACATTTGCCTACAATTTTAAATTTTATAATTTCAAAAGCAAATGTTTTGGTAGAGACCTCAATCTTTACATAGATTTGTTCTCACGTTTGATTGTTTTTAATGTTGGGTGTGAGTGAGAAAACATCTTTGGTATTT
	7685	AATTCTGTAGGCTCAATTATTGAGGTTTTGGTTTAGTAACTCTTCATTTTAAAGAGCCCTCTTTTGGTTATATTTGTTTATTTGACTTAAACAGCATCCACTGGCTTTTTCTGTTCCTTTGTAGTTTGCCTCCTTTGTTTGTGTTTTGTTACAATCTAAGTTCCTTGTTAAATAAATAACTTTGCTTTACCAAAACTGGTTTTATGTTGCATCCCTTTCCCCCAGTGAGCTCGGTCGCAA
	7742	AATTCAGTAGCCTGTGAGTTCTAGGAAGTTGTGGTATTAGTAACTAAGTAGGCTTTAATGTTGTACTTAAGTACACTTCAATGGATATAAATTTTTTTAGGGGAGCCTTTCTTTTAAGTGCCAAAAATACGTTTTTCTTCCGTCCCCGTCCACAGCACTGTATTGCTTTGCTCTGGTGTCGGTACTCCAGTCTGTTTCTCCAAGCTGGGGGTGTGCCAACCGCCATCTACTGTAAGTAAT
	7872	AATTCAAGCTCGTCACATTCAGCTCTGTCAACAAGCTCCCCTTCAGTGTGCAATCTTGTGCTAAATGTAAAAGATGGTGATGTTCTGTCACTGTGCGTATGATTTAACAAATCAGTTTTTTTGCTTAAACTAAAGTAATTGTTTCACAACGTTAACCACGTGGCATTGTGCGTTTCTGCAAGCAGAAACTCATCCTTGGACATTTGTGTATGCTGAATATGAAGCTACAGCCAACAGCCA
	7904	AATTCCTCTTTGTCCAATGTTCTATATTTTTCAATTCAATTTGCTTTATTGGCATGACTTGTCAGGTGAACAATATTGCCAAAGCGTCAATTCAATAATAAATTAAAAAATTAAAAAAGAACAAAATAAATACAATAACATATATATACATACAGTATATACAATTCATTAAAGTGACTGTTTGTAAGATTCAGAAATGCTTGTTAACAGCGACACCTGTGGCCGTTAAGTCAATGAAAG
	8191	AATTCATCCAGTGAAATCAATCAGTTACAGTTGGTTAGTTTCATAAATGGATCAGGAGCCAAGGGAAAATACAAAGTCTCCATCCCACTGAGGACTGGTAAACCCAATCCTTAGGGACATGCCCCCCTTTTACAGAACCATCTACATCTTGTCTCCAAAACTGGGACAGTTCAGGAGCCAGAGGCGCTCTTATACAACAGTTTGGGCAAGTTGATAAACAGGCTGTCCTATAACCAAAAG
	8391	AATTCCTGCACATGGACACACTCGCATAATTAGTTTTGCAAATTGTGTGCACATTTGTGTCACGTGCACTCACACGCACAAACACACACTCAAGATGTTACCGTGCAGTGTTATGTAAAGTCAAACGATGCAGGTATACATTCCCGTTACCTGCACACACACACACATGCAACCAGCCACAGCCCAAGGCAGACAATAACATAGTGCTGCATAATTTCTCTTGTTATACATTCAAGGACT
	8539	AATTCAGAGCATATCTAGCGACTCCACGCGGCTGTCAACATGGAGGCGGCTGACAGCAACCCGTTCTCGCTCACAACTCGTCAAATACCGCCGTTTGGCAAGTGCCCCTCGGCATCGGAACTCGACACACGGAGGCACCCTTTAGCAACAGTAAGTGACGAACTGGGCTTTCAACTAACTCTAATGTAAACCCACCCATGGCGTTATTTGACGGTCGGAGCAAGTGACGTAGTATTAATA
	8695	AATTCATAATTCTGTCGCTGACTTGTTGCCTTTTACATTAGGCTTCTATCTAGAAACATTTTTGTGGTTTTAAGTGGAACACCACCATGAGCTGGAAGCTTAAACTCAATGAGTATCACTGTTTTAAGTGTGTTTTCCTGCGCAAACCTTTGCGGTGGTTTGGCAACAAATCTACTTGTTTAGGAAAAGATCGTGGTTTGGGTTAAAATAACTATGAAAATGGCATCACTTAAAGGTGCT
	9320	AATTCATGTTTTGTCGGGTCTGTCCACAACACAACGAGCAAACAACTTTTAAAACGCTTGTTTTCTGAAAGGAGTTCGGATGGATCAGTGCCAGGCTATACTAACATTGCAGCTGCTCCATTAACACTCCATCTAGGAATAAATACGGCAGCAACAACGTCAGTGATGACAGCGGGAATATCTCTACGCTGATGAACTTTCGCGACGTGTGTATATATTGTTAAACACCGCTTACATGAT
	9905	AATTCAGAAAAAAAGACCATTATAATGGGCATATTCCTTCCCTTTTTTTCATACAGTTATTAATTAAGGAAATGGATAAGTTGTTGCAGTCCTAAAGGTTAAATAAAACTGGTCATGTTTTAAATTGAGTTTGGTCTGACGTTCTCTCCTTTCCTGAAAAGAATGGCACATATTTAGGGAAGTAGGTTTCCTTTTTGAATAAAGTGTCTAATGAAAGAGGGTGTCGATTGTGAAGGCCAC

## Sheet: Page 1 (BLASTing)
			BLASTN results
Catalog ID	Sequence/ RAD tags	Max score	Total score	Query cover	E value	Ident	Accession	Genes and/ or Function of associated protein	Species	Reference
1926	AATTCAAAGTTCGCTTTGCTTTGCGGCACAACTGACTGACATGTTCTTCTGTCGGTCTGTCTTCATTTCCGCTGTTTCAGTACCCAGGACAGTCTATCTGTCTGAGAATAACTAATAATAATGAATGTTGAATATGAATAATGTTATGGGATTATTCCTTATTTCATGGGCTGCTTGTTAAACGAAGTATTTGAATACAACGGCAACGGTCGAAGCTTCAAGGCGTTCGGGTCAGCCCTA	91.5	134	0.52	8e-15	0.86	JQ028870.1	gonadotropin releasing hormone 1 precursor (GnRH1) gene	Sebastes schlegelii
								GnRH production/release is one of the few confirmed examples of behavior influencing hormones, rather than the other way around. Cichlid fish that become socially dominant in turn experience an upregulation of GnRH secretion whereas cichlid fish that are socially subordinate have a down regulation of GnRH secretion. Besides secretion, the social environment as well as their behavior affects the s…
								Animal sexual behavior
								GnRH activity influences a variety of sexual behaviors. Increased levels of GnRH facilitate sexual displays and behavior in females. GnRH injections enhance copulation solicitation (a type of courtship display) in white-crowned sparrows. In mammals, GnRH injections facilitate sexual behavior of female display behaviors as shown with the musk shrew’s (Suncus murinus) reduced latency in displaying …
								An elevation of GnRH raises males’ testosterone capacity beyond a male’s natural testosterone level. Injections of GnRH in male birds immediately after an aggressive territorial encounter results in higher testosterone levels than what is observed naturally during an aggressive territorial encounter.
								A compromised GnRH system has aversive effects on reproductive physiology and maternal behavior. In comparison to female mice with a normal GnRH system, female mice with a 30% decrease in GnRH neurons are poor caregivers to their offspring. These mice are more likely to leave their pups scattered rather than grouped together, and will take significantly longer to retrieve their pups
1981	AATTCTAGAGATTCCAATAACAAGATAATCTTACAATAACAAGATGATCTGGTGAAGTTAATGTTTCATGTAAAGGACAGGGTCTCTGTTGTACTCCCGTGTTCACAACGTTCGTGTCATTTTCACTGTACAGACGTAGTAGTTTTAAGCCCAACCATGTTGATTTTTCCTAAATCTAACTAAGTGGTTTTGTTCCCTAAACCTAAGCAAGTGTTTTTGTTTAATCCATAACAGTAAGCA	80.6	80.6	0.26	1e-11	0.89	JQ798942.1	gonadotropin releasing hormone 1 precursor (GnRH1) gene	Sebastes schlegelii
2777	AATTCTGTCCACAGAAAAAAAATGCTTCAGGGCTTTTCTTTTGAAATGAAAGCAGGAAGTATTGATTTAAAAATAAGTCTTTACTTTTTTTCATCTCCATAACATTTTCTACAGATATAGACATCGAAACTGTAGTAATGTTGCTGGTATGATGTCAATATGCAGTCAATAGATCACTTTCACTGTCTGTTGTTGCTGTGAACTGCGCACGGCTCGCGTCAAAAATAGGCAAGACCTCAA	141	141	0.98	5e-30	0.74	AB491055.1	BRF 41-H4, not induced by treatment of either LPS nor Con A/PMA	Sebastes schlegelii
3677	AATTCAACGTTGATTAGTTTGTCACGCAACTTCCGTACTTAAGTAATGCCACTTAACCCAAACCACAATCTTTTCCTGAACTTAACTAAGTTGTTTCCTGCGAAGACGGAAGTTTATTTTGAAAAGACTGTATGCATGTAACGTGCGAAAATTGACACGTGTTGCTGAAAACCAACACATTCTCATCCCAACTCGTCACATACCGCCACTGTGTCACGCCCCTTGGCGTCACTTTATTTT	87.8	87.8	0.25	9e-14	0.92	AB491057.1	mRNA, clone: BRF 41-H7, not induced by treatment of either LPS nor Con A/PMA	Sebastes schlegelii	Kwon, MG., Park, MA., Hwang, JY. et al. Genes Genom (2012) 34: 111. doi:10.1007/s13258-011-0119-9
1355	AATTCATATGCTAATTATGATAATTGTACACAAATGTCTAACAGGATGAAATGATGAAGTGATGACATTTTGGACAGATATGCATGTAAACTGCAACTTGACTGGTTGGTGGAGGTATACAACCGCGAGGCGGTAATTCTAGTTAAATCGGTGACGCCAAGAACAAATGAAGATATGTCAGATTTTTAAAAAATGAATAGCAACGAACACTTGGTTATTGTTACCGTCCACAACCTTGTG	121	121	0.46	9e-24	0.87	KT260127.1	microsatellite HJ6-18 sequence	Sebastes schlegelii
5456	AATTCTTGATTTTGACGATTTTTTGATGTTTTTACCAAGTTGCTGGTGTACGATTCATTATTTTAATAATAAATAACAATTCAGTAAATGTATATCTATGTATTTATTTGTTATATTTTGTCTTACAACGCCTGATATTACCTTACACAAAATAATGATCCCAGTCCCTTTCAAGCAAACAGCGTATTAAATAAACACTGGTATCGGATCGGTTACTCCATGTCGGCCGATACCCAAAAG	143	143	0.84	1e-30	0.75	JF327132.1	microsatellite Sch-14600, microsatellite Sch-14100, microsatellite Sra.7-2, microsatellite Sch+4000, microsatellite Sch+4900, and microsatellite Sch+9000 sequences	Sebastes chrysomelas
3762	AATTCCGATCAGCCTGAGCATTAAAACCACAGGGTATAACACATGCGCAGTGTAGCTGACGATGCGTTGATGACGCATGATTCGGCGTTTTTTCACATTAAACTCAGTGAAATTAAAGTCTAGTTCGACCAAAGCACACTTGGTGATTGTCGGAAAGAGTAAAGACGATGGTTTAGGTGTTTTTTTCATCCTTACAGCCCTTAATGCAGACAACCTTTTGTACCTTTTTATGTGAAAACT	66.2	66.2	0.22	3e-07	0.87	EU747371.1	Sefu14 microsatellite sequence	Sebastes fuscescens
7141	AATTCAGTTTAGTTGGGAACGTAATTTTGCAGGAGACAGGTTTGGAAATTTGGTAGAGATATAAAGAGTTTTCCTCTAGCGCCACCATGAGGTTCACATCTGCACACATTTGATAGACGTTTCACCTATAGCAGCATCATCAGGTCAGAACTTTAATTTATCCAATATTTTTGGTTAGGGCCAAATATTTGCTATAACTATAACGGCATTCCCATAAGTCTAATTAGCAATTTACTATGC	55.4	55.4	0.38	0.0006	0.75	KF744235.1	immunology, complement component 4 (C4) gene	Oplegnathus fasciatus
4084	AATTCATTTTTTAACAAAGGAAGAAGAAGTGAAAGGAATCGTTCAACATTTTGGGACCAATGTGGTTAGCCTAGCTTAGCATAAAGACTGAAAGCAGGGGGAAACAGCTAGCCTGCACTAAACTCCTCGTTAAATCAGTTGTTGTTTTGATCTGTCACTTTGGAAGGTATGTTGTAAAAGTGCTAATAATATATGACTTAAAAAACCCTCTAAGCCCAGCAATAGGTGAAGGAATACAGT	87.8	87.8	0.23	9e-14	0.95	AB665352.1	immunology, mRNA for VHSV-induced protein	Oplegnathus fasciatus
4836	AATTCTCCTGTCATGTGTCATTAAACCACTGCAGAAGAAGAGGACACACTGAGATGATGTAATTACATAGAGCACCTGTCAACCGTTGGGCGCTACCCACATAATCAGCTCTGTTTTTCCCGAGTTTACATCATTTGAGGAAGGTTACAGTCTCCTCAATCGCACCACAGTTCTGATGTTTAAAATGTCTCTCATTTCTTCTGGTTGTATGAGAGCATAAAAAGCCTTGAGTTGTGTTTT	73.4	73.4	0.27	2e-09	0.86	KF408222.1	immunology, complement component C3 (C3) gene	Oplegnathus fasciatus
								• DNA repair	Notothenia coriiceps
								• replication fork processing	Stegastes partitus
								• cellular response to DNA damage stimulus	Lates calcarifer
2243	AATTCTCTCCTCATGTGAACCATTGCAGTCAATGGAAATCAAGCATTTTTAAACATCAGTTTGTCACTCAATCATTATAAAAAAAAATGACAGACATCTCTGTGTTGTCTAGATGAAGTACGCAAAGTCTCAGAATTTTGTCTCAAAAACTGAATTTTTAACAAGTTTGAAATCTGCCTTCATAGTGGGAAGTCATAATATGATATCATAGTGTGATGTCATAGTGTGAAGTGGTAGTTT	78.8	78.8	0.74	5e-11	0.69	FQ310506.3	GATA-binding factor 2, embryonic cell development	Dicentrarchus labrax
9320	AATTCATGTTTTGTCGGGTCTGTCCACAACACAACGAGCAAACAACTTTTAAAACGCTTGTTTTCTGAAAGGAGTTCGGATGGATCAGTGCCAGGCTATACTAACATTGCAGCTGCTCCATTAACACTCCATCTAGGAATAAATACGGCAGCAACAACGTCAGTGATGACAGCGGGAATATCTCTACGCTGATGAACTTTCGCGACGTGTGTATATATTGTTAAACACCGCTTACATGAT	96.9	329	0.47	2e-16	0.82	FQ310506.3	Mutations in this gene cause epidermolysis bullosa junctional Herlitz type, and generalized atrophic benign epidermolysis bullosa, diseases that are characterized by blistering of the skin. Multiple alternatively spliced transcript variants that encode the same protein have been found for this gene	Homo sapiens
397	AATTCAGAACTGAGCTATATCTGATCATGTGGCTCTAAATCAACTGTGTGGAATTAAACAGATTGTAGATAATGAATTATACTAAGTTTAAAATAAGATGAATTTCTTATACTTTTTTTCAGTCTTGGAAGGTTGTTCTGATATTCCCCTATTGAATATAACCTAAATTAACATTACTAATGGATTTAATGAACATTTTTAGTTTGTTGTTTAAAATTTAATGCAAATTTAAGTAAAAAT	64.4	64.4	0.7	1e-06	0.69	FQ310507.3	cell-cell and cell-matrix interactions, including fertilization, muscle development, and neurogenesis	Dicentrarchus labrax
1547	AATTCAGAGAACAAGTGGAGTTTAGAGAATGACTTCAGTGAGGTTCTGTAAACTAGTAGAGGAAGTAACAGCAGTGTTGGTGTTATTCCTGTCTCAGCCATCACCCCCATCCTGCTGGACGCCCTCACCGATCCGTCCAGGAGGACTCAGACGTGCCTGCAGACGCTGCTGGACACCAAGTTTGTCCACTTCATCGACGCCCCGTCCCTGGCCCTCATCATGCCCATCGTCCAGAGAGCC	224	224	0.6	5e-55	0.94	XM_015398330.1	cellular response to amino acid starvationSource: UniProtKB	Cyprinodon variegatus
								cellular response to leucine starvationSource: UniProtKB	Stegastes partitus
								positive regulation of kinase activitySource: InterPro	Homo sapiens
								positive regulation of transcription from RNA polymerase II promoter in response to stressSource: UniProtKB
								regulation of translation
4337	AATTCATCTTGTCAAGCCAGCTACAGTGGAGGAAATAAGTATTTGATCCCTTGCCGATTTTGTAAGTTTGCCCACTTACAAAGAAAAGAACGGTCTATAATTTTAATGGTAGGTTTATTTTAACAGTGAGAGACAGAATATAAAAAAAAATCCAGAAAATCAATTCATATAAAAGTTATAAATTGATTTGTATTTGATTGTGGGAAATAAGTATTTGATCCCCTAGCAAAACATGACTCA	253	858	0.93	1e-63	0.85	EU621898.1	clone 11F04_73D15 interferon alpha 1-like gene, complete sequence; growth hormone 1 gene, complete cds; and skeletal muscle sodium channel alpha subunit-like, myosin alkali light chain-like, and microtubule-associated protein Tau-like genes, complete sequence	Salmo salar
								transcription, DNA binding	Notothenia coriiceps
									Stegastes partitus
6272	AATTCTGTATAGAGCTCCTTTAATGAGGAGTCAACCAAGGAGGTCAAAGCACGACACAGAAAGAAACTAGAAACTAATGCATGCGTCTGATGGGTCTCTGTGTGCTCTCTGACTGGATGTTTGGTTCAACCAGCAGCATACGGGACGCAGAGACTCTGAACCTCACTGAGAAATTTGGCAAGGAAGGCCGTCATTGTGGCCTGAGGCTTCAGCTCTGGTCAGAGGACGACTAGATGTGGA	69.8	69.8	0.55	3e-08	0.73	XM_004556270.3	immunology, hyaluronidase-4-like (LOC101478980)	Maylandia zebra
7068	AATTCTTTGTGTGTGATGAGGAATCTGTCCTACCAGCTATACACGGAGCTTCCTCCGTCAGTCCGACTCCGTCTGGAGGGACCGACGAGAGCCTCCGCCTCCAGGGAGAGCGACGCCATCGGCTGCTTTACTCTTTATAACAAGAAAAACACAGAGGTAAAGGTCACCACGCGTCATAAGATTATTACACCACCAGACACACCACTCCAAGCTCATGCTAATGTTGCTCTTTGTCTGCAA	197	197	0.66	7e-47	0.88	XM_010793422.1	• single organismal cell-cell adhesion	Notothenia coriiceps
								• desmosome assembly
								• cell adhesion
								• establishment of protein localization to plasma membrane
7742	AATTCAGTAGCCTGTGAGTTCTAGGAAGTTGTGGTATTAGTAACTAAGTAGGCTTTAATGTTGTACTTAAGTACACTTCAATGGATATAAATTTTTTTAGGGGAGCCTTTCTTTTAAGTGCCAAAAATACGTTTTTCTTCCGTCCCCGTCCACAGCACTGTATTGCTTTGCTCTGGTGTCGGTACTCCAGTCTGTTTCTCCAAGCTGGGGGTGTGCCAACCGCCATCTACTGTAAGTAAT	64.4	64.4	0.55	1e-06	0.73	XM_010785944.1	acyl-CoA metabolic processSource: HGNC	Notothenia coriiceps
								long-chain fatty acid metabolic processSource: HGNC
								long-chain fatty-acyl-CoA biosynthetic processSource: Reactome
								very long-chain fatty acid metabolic process
4555	AATTCATGTTGCTCTTTTATATCTTCTCTTAAATAATTCATAATTTAGTTTAATCTTTTTTATTGCTAATCTATTTTTTTCGAGTAATTTTGTCTCGTGTGTAACATTCATTCACTCATTCATAACATCAATAAACACGTGTGTTTCTGTGTGTGTCAGTCTGATGGAGGAGGTGAAGCGTCCTCAGGTGAAAAGGACTCTGGGAGTTCTGCAGGTCACCAAGTCCAGAACTCTGCGAAC	131	131	0.34	9e-27	0.95	XM_010754625.1	cilium assemblySource: SYSCILIA_CCNET	Larimichthys crocea
								cilium movementSource: SYSCILIA_CCNET	Notothenia coriiceps
								determination of left/right symmetrySource: SYSCILIA_CCNET	Stegastes partitus
								flagellated sperm motilitySource: SYSCILIA_CCNET
								heart developmentSource: Ensembl
								lateral ventricle developmentSource: Ensembl
								outer dynein arm assemblySource: SYSCILIA_CCNET
8539	AATTCAGAGCATATCTAGCGACTCCACGCGGCTGTCAACATGGAGGCGGCTGACAGCAACCCGTTCTCGCTCACAACTCGTCAAATACCGCCGTTTGGCAAGTGCCCCTCGGCATCGGAACTCGACACACGGAGGCACCCTTTAGCAACAGTAAGTGACGAACTGGGCTTTCAACTAACTCTAATGTAAACCCACCCATGGCGTTATTTGACGGTCGGAGCAAGTGACGTAGTATTAATA	57.2	57.2	0.26	0.0002	0.8	FQ310506.3	immunology, Gag-protease	Dicentrarchus labrax
8695	AATTCATAATTCTGTCGCTGACTTGTTGCCTTTTACATTAGGCTTCTATCTAGAAACATTTTTGTGGTTTTAAGTGGAACACCACCATGAGCTGGAAGCTTAAACTCAATGAGTATCACTGTTTTAAGTGTGTTTTCCTGCGCAAACCTTTGCGGTGGTTTGGCAACAAATCTACTTGTTTAGGAAAAGATCGTGGTTTGGGTTAAAATAACTATGAAAATGGCATCACTTAAAGGTGCT	64.4	362	0.24	1e-06	0.97	FQ310507.3	artery morphogenesisSource: Ensembl	Homo sapiens
								cell agingSource: Ensembl	Dicentrarchus labrax
								developmental growthSource: Ensembl
								heart morphogenesisSource: Ensembl
								in utero embryonic developmentSource: Ensembl
								positive regulation of fibroblast proliferationSource: Ensembl
								positive regulation of transcription from RNA polymerase II promoterSource: Ensembl
								transcription, DNA-templatedSource: UniProtKB-KW
								vasculogenesisSource: Ensembl
								vitellogenesisSource: Ensembl
926	AATTCCCCAGTCTAAAATATGTTATTAATTTTTTCTCCACAACCATCTTGCGACCCCTAGAATCGATCTTGCAAACCCCTTGGGGGTCCCGACCCCCAGGTTGAGAACCACTGCCTTAAGCAACTCTCCCACAGCAACGCAGCCCCCTGTCTTGTTTTAAGGGCTGTTTTCAGTCTGAATGCTGACTAAGCCTTCAGTTTCTCTTTCACACACACATTAGATTTAAAGGTACTGTTTGTA	63.9	63.9	0.16	1e-06	0.95	JN955978	Cerebral cortex development	Mus musculus
5520	AATTCATCATTCAGCACACCTGGGTGTGAGCAGATTTGGATGGTTAAGAAGGTTTGGTGCATTTGGTGATCTCTTATTTTTTTCTTTTAACAGAAAATTGAGAGAAGTGGTGCATGGGTCAAACAAACACAGGACTTTCACCCAGGAGACTGCTGTTCGTATCCCCTGTGAAACCAAATGGCAATGTTCTCTTATTTTAATTTACATTCATAGACCCTGTTCAGACCTGGTATTAACATG	84.2	84.2	0.28	1e-12	0.88	FQ310507.3	DNA integration, recombination	Dicentrarchus labrax
626	AATTCAAAGAAGCAGGTTTCTTTTCTTTTCAGTTATTTTACAACCATGATGATCAAACAGGATACTTGTAGTTGCTTTACTGTCTCTGTCTTCTTCATGTACACACATTTCATACTTTTACACAATCATAATCTACTATATATGACATTCATTAGCTGAGAGTCATCCTTATCAACATACTTCTATTGCAACCTACACACTAAAATCAGAAAGAAATGCCAGTATAAGACATAAACAGCA	42.8	42.8	0.3	3.4	0.75	LN679998.1	Growth-inhibitory effects	Dicentrarchus labrax
1448	AATTCTTTAATATTATCGATTTTCATGCTCACATTCATGTAGTTTCAAGCTAGGACATTGAGGTCATGTCCTCAGTGTTGTTTCTGGAAATTTGGTGATATTAAGTATGGGAGGACAAGTTTACATTTTACATTTAAAAACGCATTACACAAGGTAGTTACAATTTACAGGAAATTTGCAAAAAAATGACCCCAGTGGGGTAGCATTTGATTTCAACCTCCCCATTTAGCATTCTTAAGC	53.6	53.6	0.18	0.002	0.86	FQ310506.3	Nucleic acid binding	Dicentrarchus labrax
937	AATTCAAGTGAGAAAAACAACAAAACTTTTTCCTACAGTGGGGTTTCTCTCCTAATACGACGTAACATCTTTGTTTTTGTTTTTTGGAGTCCAAAAAGGATGTTGAACTGGTCAAATAATTTCTGAATATTGCTTGGTTAGTACAGTGTACTTTGGTGAGGGCAAAAGATGAGGATGGATCCTGGTGATACAAGAAAATATGCTCAACAGTTTGCACTATGTTTCATCCTTGTTGTTTTA	53.6	53.6	0.32	0.002	0.77	XM_018678126.1	DNA repair and programmed cell death.	Lates calcarifer
1379	AATTCAAAACAATCTCTTTCTCTCCCTGCCAGTCTCGTTCTCTCTCATTCATAGTCTCCCACCTCTTTAAGCCTTCCTGTGCATCTAATATCTACCTGTTTATAGCATGTACTATATCAGTTACTCCTAAAAATTCCCGCAAAATCCACCGCTGTTTAGGCCAGAAAACACCCCAATCTCTGTTTTGTACGATCAAAACGCTGCTCACGCTGCAAACACTGCCTTTAATTCCATCACCTG	69.4	69.4	0.27	3e-08	0.86	FQ310507.3	required during several cellular processes, such as cell motility and phagocytosis	Dicentrarchus labrax
1604	AATTCAATTCTCATTGTTCGGCACATTCCTGTAAAAACACTTAAATAGTGATGCACATGCATCTTCTTTTAACCTGCTTGCAGTTTACGGTTGTGAAAGAGGTCGGTGGTGCTTTTAGTGTGTTGTTTGGAGTCTGTTTGTTGCCACCTCTGCATCATGCCCCACCTCCCCCCTCCGTGCAAGTGCTAAGCCTTTTGTGACTGCTGTTAAAGGACCAAGCCGTGAAGGACAAAGCCCTCC	80.6	80.6	0.24	1e-11	0.9	XM_014126883.1	hippo signalingSource: UniProtKB	Salmo salar
								positive regulation of pri-miRNA transcription from RNA polymerase II promoterSource: BHF-UCL
								transcription initiation from RNA polymerase II promote
4719	AATTCATGCTATTGCTCTGCTTTTCTACAAAGGCCGAGGCCCTGTGTGATAATACATAACCAACATAAATATGATGTATGAATGACCTGTAGCCTCCTAGGGAGCGCAAGGATGTCTTGTTCCTTATATTTTTAGATTTAATACACGCCAGACGGCATTAGTTCTCCCTCTTGGGGTGATGTCCACATCAAGAAAATTTATATTAGCTAAAAATTCTGTGTCTGGCATGCCTGCTGTGCT							No significant hit
5483	AATTCTAACTGTTATGTTGGTAACTTTTATCTCATCAAAGCCCACAGAATCCCACTGAGACAGCAGCCTTTCTGTTTCAGAGCGACCACTCCTTCTTCTCTGTTGCTCTCATTTGGACTGACTGTTTTGATATTGTTGGTGAAATCTGACTCAGGAGAAAAAGGCTGGTTAAGATGCAAAAGACCCTTTATTTGCATAAAAGATTTAAGCCTTGCGTCTCTGCAGTCAACACAAAATTGA							No significant hit
5507	AATTCCCATTCTTATTACTTGGAACTTTTCCCTCCATCACCAAGACTTCCATTGTTTATCCTAACATTTTTCCTGAAAGACAAGCCTGTGCCTCAAACATAGCCGCACATCTGTCTAAATTCATTTGGTATACCTACAATTTCCACAGAAGATGCTTCTCTTTTCTGGCTCAAAATAGGACCTGACTGATCCTAATAACAACCTTGCGTGTTAACATTTGGACCACAGCACGTTGTCATC							No significant hit
5869	AATTCAACCACACACCATCTGTCAGTCAAGACTATAATATATCTAGTTAATATGGAGCTTTTCATCTGAGTGTCGTTAATGGTCTAAATAAGTGCACATGGCCCAGGCTTAAATTACTTAGCTAACTTAATTTACACTTAATCTCATTATGGTAACCTCCAATGCTAGCTACCTAAAACAGCTAACTAGCCAGCTAATGAAAGCTAATCAGGTTCTGATTATTCTTCTACTCTATGGGCT							No significant hit
6286	AATTCAGAATAGAAGTCAGATTAAAAGTCTGAAAAGACTTTGTTGTGTGATTTCTTTTGCAATGAACACAGTCGTTTCTTGTCATTAAGTCTGTTTTTTTCATTAATTAAGCAGGTTAGTGGCCATATTGAAACATAATAACCACTTTATTTTATCTCAACAAGCAATAAATAATTTACCCCAATCATCCTCTGACATGCTTAAAGATGCTTTCTTTTCCATATTTTCGGCAAATTAAGG							No significant hit
6581	AATTCACTTAAAACATGAATGAATCAGATACAGGGAAGGAAAACGCATCTCCTTTAACATGGAAGTGTTACTCTTACTGTGTTATATGTTCTATATTCCAGTAAAAGAACAAGAGGTCAGAGGTCTTTTAGAATCATGGGGAGGCTCAACACATCATAACATTAGTTTATATAAAGTATATAGATGATAGCAGGGCTGTCGATCCATTCAAATATCAAATCAAGATTAATCACACATGTT							No significant hit
155	AATTCAAAAGTGCCAATTATTGGTGACTAATTGCACCAATTAGAGATGAAGCCACCTACATTCATGTTCTGTGGTCTATTGTTTGGCAGAAAATCAAAAGACGAAAACATAAATCTGCTTTCCAGACCGACCTCACTGAGAAATTAGCGTTGCTCTCCATTTTTTCACCCCCTCCCAGTTTCCACTTAGACAGTTTGACACAAATTGCACCGAAACGAAATCCTTGGAGCCAACAACTCA							No significant hit
278	AATTCAAATTCCCTCCCATGGATTTATGTCTGCCGCCAGGTCTGAACAGAAGTCCTAACAAAGTCTTCCTCTGCTACACAAACATCTCCCTCCTAGTGTCGTTACAGTCATTACAGTACACTATTAGATGTGCGCTTGTAAAAATAAACTGTGTTTAACTCCGTAACTGCACCTATTGTGTCTGGCCTTTCACCATTAGAACACACTGGGCTGTGGAATGTTTTCTTCTCTTTATCTTTC							No significant hit
1575	AATTCAAGGCTTTCCTGGGTGGCTTTCCAAGCCGCTAAAAAGGATGGTAGAGATCTCCACGTCGTGTTCCTGGACTTCCTGGGTTCCTTATAACATCTTTTGGACTGCACTCAACTACTTCAGGATCCCAGAGGCTATCACTTCCCTTGTCAAAACCTACTTCTAGGACGTGCAGCTGTGCTTGAAGACAGCTTAGTACACCACGGCATGGCAACATCTGGAAGTAGGCATCTCGGCATG							No significant hit
3589	AATTCCCTGACAGATGCTGATTAGAGCAGCAGCAGCTTGTGAAAGATACTTAACACTTTGGACATAAACAGGATATATACACACACACTACTTCTACGTCTACTTCTAATAAACCAGAAATCACTGCTTGACCAGTCGGACTGTTCTGATGAGGTTGTGTATTCTCTAGAGCCTCGTGAAAGAGATGCCTGCAGGCCACACAGCTGGAGCACATTGTGAAGCTTCTTGATTTGTATTTCC							No significant hit
3759	AATTCATTTTCTTCTCTTTTGAGGCAATTCTACATGTGTTGGTAGAGCAGGAAGCCTGTTAACTTTTCATTTTGAGCATTTAGCTGAAAGCACCACTGTGCCTACGTATAGCCTAGCTGTAGACTCGGTTTCCAAGTTTCAGCAGCGCTGTAAAAGGTAGCCGTTATTAGCTCTGGGAAAAATAATTTCAATGATTTTAATCCTCAGGTAACGGCGATGTTTTAGTGTCCTGCATGCATA							No significant hit
4671	AATTCTGTCAAGTACAACAGTGTGAACATCCGAACTTGTAGTTATTACTGAAAAATTAATGATTTCTGTAGCTGCTCTGGAAGCCACAATTACAAATGCAAAAAAGCCTTCAAGGTTTGCCAGAGCTTATTGGTGACATTCTTATGTAAACAAACATGCATGTAAACAGCAACGGGCAATATCGAGGTCAGCAAAAATGGTCGAGGTCATGTTCGTATACTGTATCGTACGATAAGTTGA							No significant hit
5126	AATTCACCATCAAAAATTAATGCTTATTGTGGTGAAAGCAGAAACACCAGTAAAGCAGTCTGCATTCATCTATAAATTGATATGAATGATTCTTGCAGTATCTGTATCAGCTGCTTTAACTCTTTGAAAAATGTCTGAAGGCAGCAGGACGGACATGTTAACAAATCTGCACATAAACGGATTCATCAACATTTCTCAGTATTTATTTCTATCATGATTGTACAAATCAAATCAAATCCC							No significant hit
5657	AATTCTAACTCACAACATTGACTACGGCTTTGTCCGAAATCCCATACTACGCTCTACATACACAATATATGTACTATTGTTCAACATACTTTTGTGTGAATAAACAGTAGTTTGTATCTGTTCGGACGCACTGAGCAGTAATTTACGTCGTCACTTCCTGAGAGCCTCCTCGCTGGTTGGAGACACGTAACCATGGTAACCCGTGCCAACCTCATGTGACCGAACAATGATTTGTGAGAA							No significant hit
5708	AATTCAGTTGAATTTTACAAAGAGAAAGAAGAGGTATTGGGAGAGGAAATGAAACGATTACGAGAGCATCAGGAAACTCATTGAGGCATTTATCAAGCTTAATGAAAAGGCTCCATATGGACACGGCGCAGGTCAAATGAATAAGCTTTTAAAAATCAATCTCACCAATTACTGTCTGTCTCACTTGTGAGCGAGTCACGCTCGACTCGGCACCCAGTCAAAAGGGGCAGATGCAGGGAG							No significant hit
6567	AATTCACCCTGAGGGGGGTGGGGAGGCACACCGTTTAAAGGACATAAAGGAGGATCTAATGTTTCTGTCTTAAAGGTGCGTTCAGTGAGACGAGGCTCTCTGCTGACCTCTGGTGGCATCAGCTGTGTCTGACCTCTGACCTCTGACCTCTGGTGGCATCGGCTGTGTCTGCTTCAGGATCATCTGTTAGTCGTCTCAGACAGAGCAAAGTGACTCCAGCTGCCCAGCAGCTCTCCTGTT							No significant hit
7326	AATTCTCCGATTTTTTTTTTTTCCTCAATGTGGCCCTAATACTCCGTCATACCGTCGTACCATAGACCTACAACAATGATGAATAAAAATGAATATGTAAACAAAAAAACAGTTATTAATTTCCATTTTTAAAAATCCACAGGGAGCCACTGGAGAGGAGCTACAGGTTGCTGACCTCTGGTCTGAGGCGAGGCCCACAGTCTCAGACCTTGAAAACCGCTGATCTAAACCATTACCTTA							No significant hit
7612	AATTCTTTTGATAAGTCAGTGGAATTTTAACACTAAGACTTATTTGTTATTGTGTGAATGTTTTGTTTTGAGCAAAACACAGGGAACCCCCTAATTCACAGCCGACATTTGCCTACAATTTTAAATTTTATAATTTCAAAAGCAAATGTTTTGGTAGAGACCTCAATCTTTACATAGATTTGTTCTCACGTTTGATTGTTTTTAATGTTGGGTGTGAGTGAGAAAACATCTTTGGTATTT							No significant hit
3	AATTCACTTTGGATACTTCGTCAGCATAATGCAGTTTCATATTCACAGACTGTTCAGAACTGGCCATCAGATGGCTTTTAATAAATGAATAGCACTTAAAATCTTAAAATGTGGGACTATAACACACAGTACAAATGCACAGAAACATGTATAATTACTACTTTTTCTATTGTATACATCATGCTCTCCTTTCACTATTAAAACTATGATACTGGTTAAGCTTAAAGTAACAGTGTGTAG							No significant hit
36	AATTCCCACGAGTAAAGATGTGCAGTATGCATGGGTAAAGTGCAAATATGAGTGGGAGGAGATTAGAACTATCAGATGTAAAATCAGAAAAACAACATTGTCGAGATTGAAGGTGTAAGATAAAGACAATGGCAGAGAAGTCTCTCAGTTTCATCACGAGGTAGATTAGCTTGCCCTGCAGCGTACGGACCGTACAGTGAGTTACAGCTTTATGCGTTTGGTGGTTTCGCTGTACATTAC							No significant hit
436	AATTCACTGTTAAGACTCTAAGAAAAAAGGAAATGAGCAACCTCATATCCAGTGAAAGGTGCTATTTTTTCTACATCTCAGCAGTGCCAGACTGAGGTCTACAGCTTAAGCATAATGTGCATTTAATCAGAAGAAAGTGGCCCTGGTTGAAACCACTCTTGATTATAATCACGCTGTGACATAAATAGCTTTTTTGCACCAGTGAACGGGTTACTCTGTATGATGCTTGGGCATCCATTT							No significant hit
499	AATTCAGTTGTGTCGCCAATTTACTGGGTTATATATGTCTGAATGCAGTGCATGAATAAATGTAAATATGGGTCTATGGGCTTTCAAAGCACTCTTAAATGATAATCATAAACCAATGATCTGATGGGGATTATGGGTTTAAGGCATCAGAAGTCATCACACCGTTTTTCTACTGCGTTTTATGCATTAAAGGAATTATGTATAAAAGAATGTTATTTGCAAGCCTAGTGCTGGCAAAAA							No significant hit
789	AATTCAGGAACACCGTATTGATAGTCAGTGTGCCTCCACTTTGTCCAGTTTCTTTTCATGGGATTTACATGGAAATAGCTGAGCTTGAGCCATGTGTTGATGTGCACAGCGAGGTCTGAGACAGAGGGAGAGTTTTTGTCAACTTTATTTCTCAGAGCAGTAAAGCTTTAACCATGTTTCCATTCACATATTTTTATGCACATTTTGAAGTATCACATTGGAAAAGCTGTATGGATATGG							No significant hit
3569	AATTCACTTGTTACCACAGCTACATTAATGGATCTGTCAACACAATGCTAACATGCCATGGTATACAGGATATTGTGTTATAACCTTGTCCGTACATTAGTTACAGTGGATTTGTATTAAACAATACCACATTGGTGGTAGGTTTGTTTTTTTTACATTACTTCCCATTAGCTAATCGAAAGAAATAGACCACTTACATTCATCTCACATACTGTACTGTTTACCATTCAGCCCTGTTTC							No significant hit
3632	AATTCCTATTTTGGATGCAAGGGAATGTAATAACCCCAAAATAGGACATTTGATTGACATTCCAGTTCCTCTTATTTTCGAGAGAAACCAGATATGAGTTTTGAAGTTGATCCAACTTTGGATGACGTAATGGGCGAGTGAACTTTTTCACATCAACTTTCTTTTCAATCTCAGTCTAGTTTACCGTTTTTGAACAACTGTTAAGGAATGCGTTCCCTCTTCTCATCAGGGTACCTACAG							No significant hit
2390	AATTCACTAGTCTAAATCTTTCCAACAGTTTTGTAAAGATACATAATGATATTTTTTTCAAATGATCTCACCGTCAGCGTTTAGCTGGATAAACTAAGGTAAATATTGTTTTATCCCTTTTGGTTTAATTCCATGTTGTGCATCACTTTCTACAGAAAAATCGGACATCTTTATACAGATATTACTCCGCTGACTAAATTCAATTAAACTTTGTTGTCTTACTTGCGTACAACAAATAGT							No significant hit
3193	AATTCTGGATTTCAAGAATTACATTTAAGGGTTCAATATGTTTGTGCAATAACCTGGTTAATATCCAGTTTTGAAAAGCTCCGCACTGGGACAGTAATAACAGTAGCAGCAGTGTGCTACTGTAACATTAGCCAGCATGTAGGCTCCTGCACACTCATAATTTATCCAGCCAAATGTTGGCTTTTGTGCTTAGTGTTTGATTTCTGTCAAATATTACTGCTTCAAGAGTTATTAATGATG							No significant hit
3732	AATTCTGTTGTATCCTTACACACACTCTCTATACTTTGGTTGTTGGATAGTGTGTGTGTGCTTGACTTTTGTTCTGCTGTAATAGCATTAATGTCACTTCAAACTTTATTCTTATTGGGGCTAAACACAAATGTCAAGCCAATGTTCTCTCCCCAGGATAACGGCCCGAGTCTGTTGGTTGGCTGCTGTCTGTTTAGATAGAGCAGCCATACAGTTCAACCTTGTACGGGTGAACTCGTA							No significant hit
2466	AATTCAAACATTTACATCAGATTTAACATCTGTTCAAACAAATCTAAGGAAATGTCCTTTTCTTGTCAATGTCAAAGCCATTAACAACTCACATTTTAATTCACAAAACTGGATAGTCAGTTAGGAGTTGCAACAGTCAAACAAGAAATTACATTTTATGAAAGAACATATGCACAAATTGACAGTAAAATCCTGATGTTTGTGTTGCAACAGTTTGTCCATCTGCTCGCGTGTGCGTCC							No significant hit
2734	AATTCGGCCAGACACTTTATAGCACTGAAAAAAATATACTGCCAACCACGTTTCTTTGTATTTGTGTTTACGGTTGGTAAAGTTCCTAAAAAGATGCTAGAATTGACCATCAGTCAAAATAAGTTAGTTGTAGTAAACATTATCCATCAGAAATGGTCACGTATCTCTAGAGAAAACAATTGTTTTCATTTTGGTGTCAGGATGTGTGTAATTCAGGTACACAACTAATCTCAACCAGCA							No significant hit
1984	AATTCCTCTGAACCACGAGGACCCCCCTGCCACTTAGGTTCTCACGATCCCCGCCAGAGAGTCACGCTGCTGTGGTCCGCTCCCTCCACGCACAAACAAAAACACACACAAACGTGTCACGAGTCGACGTATGTTGTATATACACAAAATAAAACCAGGTCTTCCTCCAGCTTTCTCTCTGACGTCCTCTCACAGCTGCTCTGCTACAAGTATCAGGCCTGAATGTGCTTTGTGTTCACC							No significant hit
1931	AATTCATTAGATCACATGATCGATTTCTTTGTGTGTCATTCTTTCAGAGGACACTGCTGAGATTTTTGTTAATATTTGCGCCGCCTCCAGCAGGTACAGTTTGTTTTTCTCTGTCGCCTAGTCGCTTTGTTCATCTGAGTACAGCCTGACTACTCGTGTAGCCGCTCCTTTGGCAGACCTACATATGACTGATCTACATACAGAACTAGGCTACATAATGGAGCTGATTCCAAGGCTGCG							No significant hit
4498	AATTCCTGTTATGCCTTTTTTCATGCTTGTTTTGCTTGTTAAATATATTCATTCAAATCACCCCAGAACGAATGTGTATTTTTAGTTGTCCCTTTCCTTCTCACTGCTATCTGTTCCATTGCTTTTTGCAAAAAACTACCTGCAATGCAGCCAACCACAACTGAGGTTTTACAGACAGATTATCACAGGAAGATATGCGAATACATGTGCTGTAGTCAAAAAGGCACGCACACACAAACT							No significant hit
276	AATTCTTTTCAGCATTTACAACATTTCCCACAAAGGGCTCCGAACACACACACACACACACCTGTGCTGTTTTTTTATTCTCTCATTCGTTTGTGGGGCTCAAATTGTTCTACATGGAGAAATTACGTTTATATGCAAAAATTCATCACGACCCAATACACCCATAACCATCTGGTAAGAATCAATATGTAACTGGAGCAAAATCAGAACAATTAAAGCAAGTATGAATGGTTGATGCCA	46.4	46.4	0.17	0.37	0.86	LN590702.1	Cyprinus carpio genome assembly common carp genome, scaffold: LG50, chromosome: 50	Cyprinus carpio
292	AATTCAACAAAGTTGTCCTACGGTAGACATTGAGATCATCTTTGCAAAATTGCAAGTCAGTGGAGTCAACGTTACCTGAGGTACGAAAGTCTCCGTACATGCACAGCACTTAGAAAAGAGCACCCGACTGTTGCAGCTTCACTTCTATGTTAATATTGAGCAAAATTTGAATTGAATTTGGTTTGACTGGTTAACATACGTTAAGGGATCTTAATCTGAGTAGTAAACTTGTCTCGCTCG							No significant hit
478	AATTCCTCTACGGTTAGCGCGATGGCCATATAGTCCACCTCACTTATAACACTGTACAGTATATACACAATATTATTATTTCTTTAATGACAAAATAACCTTTAGATGTACATACAGTATTCCTCGCCCTGTTGTCAGAGAATACAGCCACGGTATTAGAAGTAGCAAGCAAGTGTTGTTGTGTTTTCTTTGTACAAATAACCCATGCAACTCCCCGTATACATTATTTATTTAAGATAC	329	329	1	2e-86	0.91	XM_018661840.1	sodium/calcium exchanger 1-like isoform X4	Lates calcarifer
								Required for normal embryonic heart development and the onset of heart contractions		Ref: http://www.uniprot.org/uniprot/P32418
982	AATTCACGAGCGCGAACGAGAGTTGGAGAGATAACCGAGAGCTCATCGGGGGACGGTAAAAGAAGAAAAATAGAGCTTGTAATTTGAATGGCTTGAGCCGTCTCCCGTGTGTTTGTCTCATTTTCTTCACAGAGGATGCCCACGAGGTAACGTCGGGGTATAAACAACAGATGGTCCGCTTTATCAACGGCGAGCACTCAGCTCCTCCGCTCAGCCCTCGTGCTATTCTTTGAATTTAAG	313	313	1	2e-81	0.89	FQ310508.3	RING finger protein 152	Dicentrarchus labrax
1177	AATTCTGTGATGTAATAGTTCTCTCTCTGTTTCATCTTTTTATATCTTGTGCATACAAAATGCATTTAAAGTGGCAGTAGGCGGAATGTTTTTGGCATCATTGGGCAAAAATTCCATAACCTTTCAGCATATTGTAATTCAAAATGAGAGAAAACTAGACTTCTGCACCTCCTCATGGCTCTGTTTTCAGGCTTTAAAAAATCCAGCCCGTGATGGGAGACTTTGGCCAACCACAGGTCA	237	237	0.73	1e-58	0.89	JQ247584.1	gonadotropin-releasing hormone 3 precursor, multicellular organism development	Sebastes schlegelii	https://www.ebi.ac.uk/interpro/entry/IPR002012
1724	AATTCCAGACTTGGATCACGGCTCAAGTAGCGGGAGCGAAAGTTGGCTTTGTGACAGTCACCCCCAGTGGCACCGATTCAGACAACAGCTTTAGGTGTCCCAGGGCACTCTTCAGAAATGAGACCACAGCAGCTCCAAATACAACTTCCACAGCATCAACCGTTGCAACTGAGCTTACATTTGTTGTCAGCTTAGTGACAGTGGTCCTGCAGCACATTGTAGCTCCATAGTACAGTTTTG	140	140	0.95	2e-29	0.74	XM_018678350.1	tryptase-like	Lates calcarifer
1841	AATTCGAGCTAACTGCTATCTGAAGCTTTGTCCGTCTTTGAGAGCCGTCGCCTGCGAACTAGTCTAGGGGAGGATGAGACGGAAATACAAGTCTTCTATTTCCTTCAACTTTGGATTCAATCAAATAAACAAGCTATTGAAAAGAACACAAACTCTGTACCATCAACGTGATTGACAAGTCCTCGGGGCATCTCTACTTCTTGGTCCTCTCATGTTGGACTGAGGGCAGACTGGACGCTA	80.6	80.6	0.25	2e-11	0.89	XM_018681350.1	amphoterin-induced protein 1-like	Lates calcarifer
1913	AATTCATTGACAGCCCTAAATAAAACATAAATAGCTAGCTAACACCTAGCTAGCGAGCTAAGGCTAACTAGCATAATTGCCTCCACATATAAACACATTAATTCCCAATATATTGTAGGTTAAATGTAACCTGGTGGAAAACACAAGTGGCCAAACTATCAGTTTATTAATCAAACTGTCCCTGAATGCTCAATAAAGTAGTTTTAATAGTTAAACTTGCTCGACACTGATGATGCTAAC							No significant hit
2441	AATTCCTTTTTTTCCTCCTAGATTTTTCTCTTCAAATTGATATAGTGTTTGTAATTTAATGGACATATTTTAGCGGCTGTCTGAACATTATTAGTGGGGAGGGGGGAAAGGAAAGGAGGGTACTTATACGTTTTTTTTTGGCTGAGGGGAGGGAGTCTAACTTTCCTTTTAACTTTTTCCTCATTGTGTATTTATTGTTTTTTTTTCCAATCTGGTCTCCTAGAAATTACCAATGGTTCT							No significant hit
2846	AATTCATCTGGGGTCTCATTTATAAAACAGTGCGTAGGATCCATACTAAAAATGTACGTGCGCACAAAAGCCGAAAATGGCGTACGGCAAAAAAAAATCTGATTTATAAACCGTGCGTACGCACATCTGCACGCAATGTTCCCTTTATAAATCACACTCCACCTGGAAATGTGCGCACGTGGATCCGCCTCATATTCCGCCCTCTACACGCCCACATTCAACCATAAATGGTCCATGCAA	275	922	0.98	4e-70	0.86	LN590683.1	Cyprinus carpio genome assembly common carp genome, scaffold: LG38, chromosome: 38
3036	AATTCCCCCACACACCATCACACAATACCTGCACACACAGCAGTGCAGATTAATGTAGGAATATGCATTTGATGTCTTTTTTTTTTGTAGGTATTTCTTTTAATTGATTTATTTTTATTGATTTAAAGGGACTATTTGTAACTTTCAGAAATGCTTCTTAACAGCGACACCTGTGGCTGTGAAATCAACGAAAGTCAGCGTCGGGCTCACGCTTGCGCGCTCTAAATATACCTGAACGAG							No significant hit
3106	AATTCACAGACGAAGAAGATTAGTTGACAAATTTGCCACATTTGACTCCATGCCATAACGAGAACTGCGCTCGGAGAGCGCAGACCTCCGCCAACGCGTTACTTCAAAAACAGATCACAGCTCACAGCTCACAGCTCACAGTTGACGGTACCGTGAGTTGGTCGGCTTGTTATTAACACGGTGTGTTTCCGTGTAACGTATCAACGGATGCCTCTCTCATTCAGCAACAGAAAAACCTTG							No significant hit
3138	AATTCTATGCATGCATTTCTATTACTCCTGTGTCCTCTTTTAAAAAACTCATTTTTATAAAGTGTTTTTTAATTAGACATTGAATAAAAGCATAAAAGAAACTCCTTGGCTGCATTGCACTAATTTGTAATTGCACGGTGTACTTTCTGTTTTTTATGTTTCTGAAGCACATTGTAAATTTGTTTTCAAAAAGTGCTATATAAATAAAGATTATTATTATCGTTAGGCCTATCGATTTCC							No significant hit
3693	AATTCCAATAACAAATACAGTATATACATGCTTAAAGCAAGCATATTTTCCCTCTCCCATGTTAATAAGAGTAATAAATACTTGACAAATCTCCCTTTTAAGGTACATTTTGAACAGATAAAAAATGTGTGATAAATTTGCGATTAATCGCAAATAACTATGGACAATCATGCGATTAATCGCGATTATATATTTTTATTGATTGACTGCCGTAGCAATAATCCAGAATTACTGAACACT	235	446	0.88	4e-58	0.86	JQ028870.1	gonadotropin releasing hormone 1 precursor	Sebastes schlegelii
4301	AATTCTACTTTGATAACGCCCGTCAATAGAAGAGCTTTTTTCCCCCTGACCTGACCCGCCAGATCAACACGTTCTTATCCCTCGTCACATACTGACTCTTTGTCAGACCCCTCTGCGGTATTTGACGCCCTGGGAATGATGATGAGTTTGTTACACAGAACCATCTGAGAAGCCGTCATTGGAAACTGTTATAAAAAATACTTGGCAGGTGATTGGATGAACTATCTATCAAACAAACAC							No significant hit
4366	AATTCTTAATTCGGGTGGTGTTCCCCTTTCTCCAAAATATTGAAATGGTGTGATGTGAAAGTGTGGGTGATCAAGTGATGTTAGAAGTCACACAGTCAGCAGTTCTTTAACCATTAGTTAACAAACGCGTGGCCAGAGCCATGTGGACATGCCTTCTCTGTGCAGTTTCCAGTGTTGCTACAAGCCACATTTCGTGTGTGTGTATTGTGAGGTGGCGTCCAGATGGCCCTCACAGATGGA							No significant hit
4773	AATTCACTTTCTTCCCCCAAACTTCAGTGAATCACCTTCAGAGTGAAAGTCCACACAGGCTTCGACGACGGAATTTATCATTTAAAGATAACAATAAGTGATGTGAGTCTCTAAAACAGACAGATATTATAGAGATTCATCATCACACTCCAGCTTCTAGCTTTTGCTTCAGCCTAAGTTCTGAAAACCCACGGATCCTCCTTACGGAGAGCAGCGATCAGAACTGAGCTGGCTTTAGTT	136	136	0.93	3e-28	0.73	XM_022766512.1	NLR family CARD domain-containing protein 3-like, Immunity function	Seriola dumerili	http://www.uniprot.org/uniprot/Q7RTR2
4880	AATTCGATGGGAGAATCTCAGTCTCAACAGTAGCTATCCTCCCCAATCTGTGAGCGATGGCAGTTCTATCAGATCCAGACTAATTGGAAGAGAACCGAACAGTAATTGAAAGTGCAATATTGACTTGTGTCTGCTTGTTGCCACTAGCCTGGACTGGCTGGCTGTAAAGCTGTGGATAAGGGGGGGGGGACCCTTAGTCTGGATGACATAAGTTAAGGGTTGGTTGGTGAGGACAGGCTG							No significant hit
5043	AATTCATGTTTTTTAAAAATATATCAAAAAGGTACTGGCTCCTCATGCAATGGTTTCTCTGTAATCCCATTGCTGTTGGACAGGACCCCCCCTGGGAGCTCTCAGCTCAGCAGGACTCATTCTCACAGTTACAGGGACCATCGCTGCATCCCTTTTCCCCAACAACACAGGCTTTGGTTTGGCCCTTGAGATGACTGTGCTGTTAGCCATGGAACTACCACGAGGGCAGCTAGAGACTCT	138	138	0.79	8e-29	0.77	XM_022766843.1	Paralemmin-1, Involved in plasma membrane dynamics and cell process formation. Isoform 1 and isoform 2 are necessary for axonal and dendritic filopodia induction, for dendritic spine maturation and synapse formation in a palmitoylation-dependent manner	Seriola dumerili	https://www.uniprot.org/uniprot/O75781
5665	AATTCATTGCACTTTTATTCTGTGACGGGGCAAGAGTATGAAATGTAGCCCTATGATGTTTAATGTTATATGTTAATGAGGAAGTTATATGAAATAACTTTAAGGTATAATCTCCTTAACTTAACAGGAAAGCACTGTATGTAGTGCAGACCCCCACCAAGGGCTAAAAGTCTCTTTGAAATATCATCAAGAGGTTTCTTGCAGATTCAAAATCACAGCACAGAAAATATAACGCACAGG							No significant hit
5693	AATTCTTCAGGTCACGCTCACACGGGAGGCACAAAACCATCATGTGAAACCATGGGAAGAACAACACTGCAGACATGACAAGGTCTTACACATAAAACCACTAAGAAACGAAAAACCCCGACAGATACACAGGATGTCACAAAGGCACAGGGAACCGACAGACACACATACCAATAAAGCTGAGCTGGGAGGAAAGGGCAGGGATGAAGAGATAGGAGAGTAAATAATTAGCTGAGTCTT							No significant hit
5723	AATTCAGGACTTTTACTTGTAATAAAGTAACATTCTTTTGTGATATATATATTGTGATATTTCTACTTTTACTCAGGTAAAGATCTGAGCAGGCTAACGTTCCTTCTTCCACCACTGCATCTGCGTCCATTGTATCACGTCCATGCCACACAACCTCCATCAATAAATGCCAAGGTAAACAATACTACCTTCATATTTCAATAAAACTGTAACTTATAAAGTTAGGTAATGTAACGTTAA							No significant hit
6186	AATTCCCCTCGGCCTTCTGTGTCACCCTCCACTGCTTTTTACGGAAAACCTCATAAAACCAATGCATGACCACACTGCATGCAAATGCACACGCTCTATCACTGGTCCTCTTCTTTCTTTGTCTTTGGGTTTTTCTGTTTTTGGTTTGTCACATGCACTTATGTAGACACCTTCATGCACACAGACACCACCACATGGAGACAATGTGAAGGGAGCATTTTATTGGCTTCCACTCCCTCT							No significant hit
6392	AATTCAGAGGACTTTCCCTGAGACGAAACACTTAAACGTTTCATCTTGATTCTTTCTGTTTCATATTAACATTTCACGGCAAATTATTTGGAATGAACTATTGAACTATTGAATGTCTGGCGATCATTCCACATTCATTTCCAGTTGATCTGTATTTAGATAAATGTGTTAGAAACAGCACAGTATAAACCAGTCATTCCCGAAGACTGGGTTCGGGACCCACAGGTGGGTCGCAGGAGA							No significant hit
6450	AATTCAAATCTATAAACTTGTATTCATGTTTGACCTTTTCAACAACGACAATATATCATTCTTATCGGTTAATGTCTTCTGCTACAAGAATCATCTTTCAAAGACAAGATTGCAGGTTGTTCGTCTTCTCCTCTGTCATGCTGCTGTATTCAATGCAGTGAGACAGTAAAGAAGACAAGAGATACAGTAAAGGAGTAGCTCGACAATTTTTGTGACGGGCTTATTCGGTACCACGCTCAT	125	125	0.57	5e-25	0.8	FQ310508.3	Cadherins are calcium-dependent cell adhesion proteins. They preferentially interact with themselves in a homophilic manner in connecting cells; cadherins may thus contribute to the sorting of heterogeneous cell types.	Dicentrarchus labrax	http://www.uniprot.org/uniprot/Q9ULB5
6713	AATTCTCGTGTCAGTCTTACACCTTCCAGTGCCCTGCAGCTCTCTGTATTCACACAGAACAGGACTAAATGAGACGGTTTACATCCGTCACATCAAAACGTCTGTTTCTCAGATTCTTCATCATTTGTTGTCAGTTCAGTGTTTCATCAGAAAAAGCAAACTGAAAGAAATCTTGTATAATCCACTCACTGGTCGGGTTAACAGCTGGTCTCTCAACCTTCTGACAGACCAGTATGCTGC							No significant hit
6761	AATTCAGCATTTTGGCTGTTGCCATCTTGGTTTCTTGCAACCAGAAGTGACACGAGAGGGTAACTTACGATCTTAAGTTACGCCACTTCCGTAGTTATTTTAACCCAAATCACGATTTTTTCCTAAACACACACTATCCAATGCCTCACTTAGCATATGGTACTTCACGCTTAATGTATGACTGAAGGACAGCCAGCCTGTGGATGCTGATAATGGTATCCATCACGGTAAAATAAAAAT							No significant hit
6847	AATTCAAAGACCTCCACATTGTCAAAGTCATCTAAATATTCAGCTATGACAGTGAAAATCTTTTCTATAACATGAAACTATGCTTTCTGTACTCAAACACTCACTTCTCCTTGAGCGAGACTCTTTCCATGATGGCATAGTTAATAACAATCAGTGCCTGTCATGGCAAAAACAAGCACTTTTAGTGGGTGTAAATGACGCTGCCAGCTTGCCCCAATAGCAACATATTGCAGCCTGAGA	100	925	0.74	2e-17	0.82	FQ310506.3	R3H domain-containing protein 2	Dicentrarchus labrax
6857	AATTCACCTACAAGCACCTCTAAAGCTCACAAATTGACACGTATCTTTGACAGATTAATCCCTACAAAAACTGCGTGAAAATAATAATTTGCTGTTTGACAGGGGTTTATGTATTTTGTTGGTCAGGACTAGTTACAAGTCAACCAGCAGAGACCCAAGGAAGTTACTGTCCAGTAAAGACTGTTTTTTAAAACTTTTTTTAACAATTGAGGATATGATCTTATGGATATGGATATCCTG							No significant hit
6994	AATTCATAAACTGATGTCAGATTTCCTCTGCTTATATGGAAGCTCTTGATGGAGAGCAGCAGGAAACTGTCCCTGGTGCTGAAAATGCCCCATTATTCTTGTCACTAGGGGGCAGAAAAGCCTCTTAATTTGTCGATTTGACAAGACTTGCTCTGCCCTCAGACTATACAGCAGCACATAGGTGGGGATGTGCCACATCCTTTATAATCCTGCATCCTCCACACTGTTAAATCCCTGAGA							No significant hit
7685	AATTCTGTAGGCTCAATTATTGAGGTTTTGGTTTAGTAACTCTTCATTTTAAAGAGCCCTCTTTTGGTTATATTTGTTTATTTGACTTAAACAGCATCCACTGGCTTTTTCTGTTCCTTTGTAGTTTGCCTCCTTTGTTTGTGTTTTGTTACAATCTAAGTTCCTTGTTAAATAAATAACTTTGCTTTACCAAAACTGGTTTTATGTTGCATCCCTTTCCCCCAGTGAGCTCGGTCGCAA	73.4	136	0.37	3e-09	0.84	FQ310508.3	Cadherins are calcium-dependent cell adhesion proteins. They preferentially interact with themselves in a homophilic manner in connecting cells; cadherins may thus contribute to the sorting of heterogeneous cell types.	Dicentrarchus labrax
7872	AATTCAAGCTCGTCACATTCAGCTCTGTCAACAAGCTCCCCTTCAGTGTGCAATCTTGTGCTAAATGTAAAAGATGGTGATGTTCTGTCACTGTGCGTATGATTTAACAAATCAGTTTTTTTGCTTAAACTAAAGTAATTGTTTCACAACGTTAACCACGTGGCATTGTGCGTTTCTGCAAGCAGAAACTCATCCTTGGACATTTGTGTATGCTGAATATGAAGCTACAGCCAACAGCCA	51.8	274	0.4	0.009	0.9	FQ310506.3	R3H domain-containing protein 2	Dicentrarchus labrax
7904	AATTCCTCTTTGTCCAATGTTCTATATTTTTCAATTCAATTTGCTTTATTGGCATGACTTGTCAGGTGAACAATATTGCCAAAGCGTCAATTCAATAATAAATTAAAAAATTAAAAAAGAACAAAATAAATACAATAACATATATATACATACAGTATATACAATTCATTAAAGTGACTGTTTGTAAGATTCAGAAATGCTTGTTAACAGCGACACCTGTGGCCGTTAAGTCAATGAAAG	93.3	93.3	0.3	3e-15	0.89	KM079281.1	Sebastes schlegelii microsatellite HJ3-50 sequence
8191	AATTCATCCAGTGAAATCAATCAGTTACAGTTGGTTAGTTTCATAAATGGATCAGGAGCCAAGGGAAAATACAAAGTCTCCATCCCACTGAGGACTGGTAAACCCAATCCTTAGGGACATGCCCCCCTTTTACAGAACCATCTACATCTTGTCTCCAAAACTGGGACAGTTCAGGAGCCAGAGGCGCTCTTATACAACAGTTTGGGCAAGTTGATAAACAGGCTGTCCTATAACCAAAAG							No significant hit
8391	AATTCCTGCACATGGACACACTCGCATAATTAGTTTTGCAAATTGTGTGCACATTTGTGTCACGTGCACTCACACGCACAAACACACACTCAAGATGTTACCGTGCAGTGTTATGTAAAGTCAAACGATGCAGGTATACATTCCCGTTACCTGCACACACACACACATGCAACCAGCCACAGCCCAAGGCAGACAATAACATAGTGCTGCATAATTTCTCTTGTTATACATTCAAGGACT							No significant hit
9905	AATTCAGAAAAAAAGACCATTATAATGGGCATATTCCTTCCCTTTTTTTCATACAGTTATTAATTAAGGAAATGGATAAGTTGTTGCAGTCCTAAAGGTTAAATAAAACTGGTCATGTTTTAAATTGAGTTTGGTCTGACGTTCTCTCCTTTCCTGAAAAGAATGGCACATATTTAGGGAAGTAGGTTTCCTTTTTGAATAAAGTGTCTAATGAAAGAGGGTGTCGATTGTGAAGGCCAC							No significant hit

## Sheet: Page 2 (alignment)
															Accession	Total number of hit
															FQ310506.3	6
															FQ310507.3	4
															FQ310508.3	3
															JQ028870.1	2
